# Supplementary material
Source: ML conference proceedings conference paper supplement (https://proceedings.neurips.cc/paper_files/paper/2021/hash/806d926414ce19d907700e23177ab4ff-Abstract.html)
Supplement: Supplementary file 1 [file 806d926414ce19d907700e23177ab4ff-Supplemental.pdf]

## A The principle of symmetry breaking

### A.1 $S_k \times S_d$ -invariance properties of (2)

We show that  $\mathcal{L}$  is  $S_k \times S_d$ -invariant in its first parameter. The proof is a straightforward adaption of [3, Section 4.1]. First, we make the dependence of  $\mathcal{L}$  on the target weight  $d \times d$ -matrix  $V$  explicit:

$$\bar{\mathcal{L}}(W, \alpha; V, \beta) := \frac{1}{2} \mathbb{E}_{\mathbf{x} \sim \mathcal{N}(\mathbf{0}, I_d)} \left[ \left( \sum_{i=1}^k \alpha_i \varphi(\langle \mathbf{w}_i, \mathbf{x} \rangle) - \sum_{i=1}^d \beta_i \varphi(\langle \mathbf{v}_i, \mathbf{x} \rangle) \right)^2 \right], \quad (11)$$

Next, we observe that for any  $\pi \in S_k, \rho \in S_d$  and  $U \in O(d)$ , the group of all  $d \times d$ -orthogonal matrices, we have

$$\bar{\mathcal{L}}(W, \alpha; V, \beta) = \bar{\mathcal{L}}(P_\pi W, \alpha; V, \beta) = \bar{\mathcal{L}}(W, \alpha; P_\rho V, \beta), \quad (12)$$

$$\bar{\mathcal{L}}(W, \alpha; V, \beta) = \bar{\mathcal{L}}(WU, \alpha; VU, \beta), \quad (13)$$

where the last equality follows by the  $O(d)$ -invariance of the standard multivariate Gaussian distribution. Therefore, for any  $\rho \in S_d$  and  $U \in O(d)$  such that  $V = P_\rho VU^\top$  and any  $\pi \in S_k$ , we have

$$\begin{aligned} \bar{\mathcal{L}}(W, \alpha, V, \beta) &= \bar{\mathcal{L}}(W, \alpha, P_\rho VU^\top, \beta) \stackrel{(12)}{=} \bar{\mathcal{L}}(W, \alpha, VU^\top, \beta) \stackrel{(13)}{=} \bar{\mathcal{L}}(WU, \alpha, VU^\top U, \beta) \\ &= \bar{\mathcal{L}}(WU, \alpha, V, \beta) \stackrel{(12)}{=} \bar{\mathcal{L}}(P_\pi WU, \alpha, V, \beta). \end{aligned}$$

In particular, for  $V = I_d$ , we have  $V = P_\pi V P_\pi^\top$  for any  $\pi \in S_d$ , thus  $\mathcal{L}(W, \alpha) = \bar{\mathcal{L}}(W, \alpha, I_d, \beta)$  is  $S_k \times S_d$ -invariant w.r.t.  $W$ . Note that here we do not exploit the rotational invariance of the standard Gaussian distribution, but rather its invariance to permutations. Hence, the same  $S_k \times S_d$ -invariance holds for any product distribution if  $V = I_d$ . Indeed, critical points admit maximal isotropy types also when the input distribution is  $\mathcal{D} = \mathcal{U}([-1, 1]^d)$  (but not when  $\mathcal{D} = \mathcal{U}([0, 2]^d)$ ).

### A.2 Examples of minima for Problem (2)

We display several examples for optimization problem (2) with  $k = d = 10$  obtained by running SGD until the gradient norm is driven below  $1e-8$ .

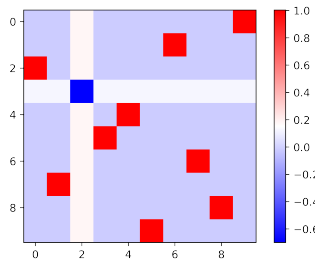

Figure 3: A spurious minimum of isotropy (conjugated to)  $\Delta(S_{d-1} \times S_1)$  of (2) with  $k = d = 10$ . The objective value is  $\approx 0.018$ .

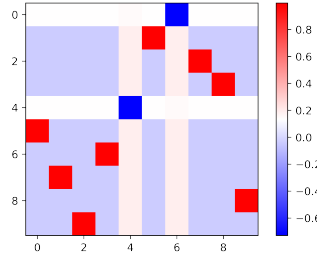

Figure 4: A spurious minimum of isotropy (conjugated to)  $\Delta(S_{d-2} \times S_2)$  of (2) with  $k = d = 10$ . The objective value is  $\approx 0.035$ .

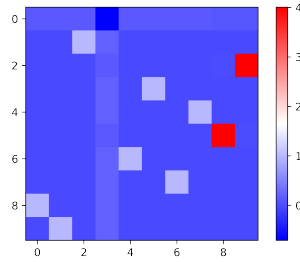

Figure 5: A spurious minimum of (2) with  $k = d = 10$ , where  $V = \text{Diag}(1, \dots, 1, 2, 2)$  and  $\beta = (1, \dots, 1, 2, 2)$ . The symmetry of the minimum adapt to that of the global minimizer  $V$ .

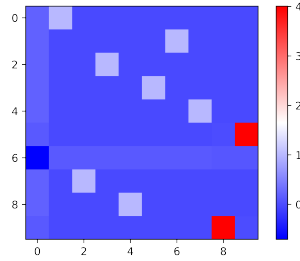

Figure 6: A spurious minimum of (2) with  $k = d = 10$ , where the  $V = \text{Diag}(1, \dots, 1, 2, 2)$  and  $\beta = (1, \dots, 1, 2, 2)$ . The symmetry of the minimum adapt to that of the global minimizer  $V$ .

## B Counting multiplicity of families of minima

The computation of the multiplicity of minima is based on the orbit-stabilizer theorem. Instantiating this theorem to the natural action of  $S_k \times S_d$  (i.e., row- and column- permutation. See Section D.1 below for a formal introduction of group action) yields

$$\text{Multiplicity}(W) = \frac{|S_k \times S_d|}{|\text{Iso}(W)|}.$$

Observing that  $|S_k \times S_d| = d! k!$ ,  $|\Delta S_d| = d!$ ,  $|\Delta(S_{d-1} \times S_1)| = (d-1)!$ ,  $|\Delta(S_{d-2} \times S_2)| = (d-2)! 2!$  and  $|\Delta(S_{d-3} \times S_3)| = (d-3)! 3!$  gives the multiplicities stated in Theorem 1.

## C Gradient expressions

In the sequel, we provide explicit expressions for  $\nabla \mathcal{L}$  (defined in (2)) restricted to the fixed point spaces  $\mathcal{W}_{d-1}, \mathcal{W}_{d-2}, \mathcal{W}_{d-3}$ , which naturally extend [Definition 10](#) as follows

$$\mathcal{W}_p := \{W \in M(d, d) \mid W = P_\pi W P_\pi^\top \text{ for all } (\pi, \pi) \in \Delta(S_{d-p} \times S_p)\}.$$

The gradient expressions corresponding to  $\mathcal{W}_d$  are given in the body of the paper in [Section 4.1](#).

In all expressions below:

- $\alpha_{(i)}^{(j)}$  (resp.  $\beta_{(i)}^{(j)}$ ) denotes the angles between the  $i$ th row of  $W$  and the  $j$ th of  $W$  (resp.  $V$ , the target weight matrix).
- $\nu_{(i)}$  (resp.  $\mu_{(i)}$ ) denotes the norm of the  $i$ th row of  $W$  (resp.  $V$ ).
- $\nu_{(i)}^{(j)}$  (resp.  $\mu_{(i)}^{(j)}$ ) denotes  $\sin \arccos(\alpha_{(i)}^{(j)})$  (resp.  $\sin \arccos(\beta_{(i)}^{(j)})$ ).

In [Section F](#), we list the coefficients of the families of minima considered in [Theorem 1](#) to  $O(d^{-5/2})$ -order.

### C.1 Gradient expressions for $\mathcal{W}_1$

The space  $\mathcal{W}_1$  is five-dimensional. A weight matrix for  $d = 8$  can be parameterized as follows

$$\begin{bmatrix} a_1 & a_2 & a_3 \\ a_2 & a_1 & a_2 & a_2 & a_2 & a_2 & a_2 & a_2 & a_3 \\ a_2 & a_2 & a_1 & a_2 & a_2 & a_2 & a_2 & a_2 & a_3 \\ a_2 & a_2 & a_2 & a_1 & a_2 & a_2 & a_2 & a_2 & a_3 \\ a_2 & a_2 & a_2 & a_2 & a_1 & a_2 & a_2 & a_2 & a_3 \\ a_2 & a_2 & a_2 & a_2 & a_2 & a_1 & a_2 & a_2 & a_3 \\ a_2 & a_2 & a_2 & a_2 & a_2 & a_2 & a_1 & a_2 & a_3 \\ a_4 & a_5 \end{bmatrix}.$$

The gradient entries, denoted by  $g_1, g_2, g_3, g_4$  and  $g_5$ , are:

$$\begin{aligned} g_1 &= \frac{a_1(d-1)}{2} + \frac{a_1(d^2-3d+2)\sin(\alpha_{(1)}^{(2)})}{2\pi} + \frac{a_1\nu_{(d)}(d-1)\sin(\alpha_{(1)}^{(d)})}{2\pi\nu_{(1)}} \\ &\quad - \frac{a_1(d-1)\sin(\beta_{(1)}^{(1)})}{2\pi\nu_{(1)}} - \frac{a_1(d-1)\sin(\beta_{(1)}^{(d)})}{2\pi\nu_{(1)}} \\ &\quad - \frac{a_1(d^2-3d+2)\sin(\beta_{(1)}^{(2)})}{2\pi\nu_{(1)}} - \frac{a_2\alpha_{(1)}^{(2)}(d^2-3d+2)}{2\pi} \\ &\quad + \frac{a_2(d^2-3d+2)}{2} - \frac{a_4\alpha_{(1)}^{(d)}(d-1)}{2\pi} + \frac{a_4(d-1)}{2} + \frac{\beta_{(1)}^{(1)}(d-1)}{2\pi} - \frac{d}{2} + \frac{1}{2}, \\ g_2 &= -\frac{a_1\alpha_{(1)}^{(2)}(d^2-3d+2)}{2\pi} + \frac{a_1(d^2-3d+2)}{2} - \frac{a_2\alpha_{(1)}^{(2)}(d^3-6d^2+11d-6)}{2\pi} \\ &\quad + \frac{a_2(d^3-5d^2+8d-4)\sin(\alpha_{(1)}^{(2)})}{2\pi} + \frac{a_2(d^3-5d^2+8d-4)}{2} \\ &\quad + \frac{a_2\nu_{(d)}(d^2-3d+2)\sin(\alpha_{(1)}^{(d)})}{2\pi\nu_{(1)}} - \frac{a_2(d^2-3d+2)\sin(\beta_{(1)}^{(1)})}{2\pi\nu_{(1)}} \\ &\quad - \frac{a_2(d^2-3d+2)\sin(\beta_{(1)}^{(d)})}{2\pi\nu_{(1)}} - \frac{a_2(d^3-5d^2+8d-4)\sin(\beta_{(1)}^{(2)})}{2\pi\nu_{(1)}} \\ &\quad - \frac{a_4\alpha_{(1)}^{(d)}(d^2-3d+2)}{2\pi} + \frac{a_4(d^2-3d+2)}{2} + \frac{\beta_{(1)}^{(2)}(d^2-3d+2)}{2\pi} - \frac{d^2}{2} + \frac{3d}{2} - 1, \end{aligned}$$

$$\begin{aligned}
g_3 &= -\frac{a_3 \alpha_{(1)}^{(2)} (d^2 - 3d + 2)}{2\pi} + \frac{a_3 (d^2 - 3d + 2) \sin(\alpha_{(1)}^{(2)})}{2\pi} + \frac{a_3 (d^2 - 2d + 1)}{2} \\
&+ \frac{a_3 \nu_{(d)} (d-1) \sin(\alpha_{(1)}^{(d)})}{2\pi \nu_{(1)}} - \frac{a_3 (d-1) \sin(\beta_{(1)}^{(1)})}{2\pi \nu_{(1)}} - \frac{a_3 (d-1) \sin(\beta_{(1)}^{(d)})}{2\pi \nu_{(1)}} \\
&- \frac{a_3 (d^2 - 3d + 2) \sin(\beta_{(1)}^{(2)})}{2\pi \nu_{(1)}} - \frac{a_5 \alpha_{(1)}^{(d)} (d-1)}{2\pi} + \frac{a_5 (d-1)}{2} + \frac{\beta_{(1)}^{(d)} (d-1)}{2\pi} - \frac{d}{2} + \frac{1}{2}, \\
g_4 &= -\frac{a_1 \alpha_{(1)}^{(d)} (d-1)}{2\pi} + \frac{a_1 (d-1)}{2} - \frac{a_2 \alpha_{(1)}^{(d)} (d^2 - 3d + 2)}{2\pi} \\
&+ \frac{a_2 (d^2 - 3d + 2)}{2} + \frac{a_4 \nu_{(1)} (d^2 - 2d + 1) \sin(\alpha_{(1)}^{(d)})}{2\pi \nu_{(d)}} + \frac{a_4 (d-1)}{2} \\
&- \frac{a_4 (d-1) \sin(\beta_{(d)}^{(d)})}{2\pi \nu_{(d)}} - \frac{a_4 (d^2 - 2d + 1) \sin(\beta_{(d)}^{(1)})}{2\pi \nu_{(d)}} + \frac{\beta_{(d)}^{(1)} (d-1)}{2\pi} - \frac{d}{2} + \frac{1}{2}, \\
g_5 &= -\frac{a_3 \alpha_{(1)}^{(d)} (d-1)}{2\pi} + \frac{a_3 (d-1)}{2} + \frac{a_5 \nu_{(1)} (d-1) \sin(\alpha_{(1)}^{(d)})}{2\pi \nu_{(d)}} \\
&+ \frac{a_5}{2} - \frac{a_5 (d-1) \sin(\beta_{(d)}^{(1)})}{2\pi \nu_{(d)}} - \frac{a_5 \sin(\beta_{(d)}^{(d)})}{2\pi \nu_{(d)}} + \frac{\beta_{(d)}^{(d)}}{2\pi} - \frac{1}{2}.
\end{aligned}$$

## C.2 Gradient expressions for $\mathcal{W}_2$

The space  $\mathcal{W}_2$  is six-dimensional. A weight matrix for  $d = 8$  can be parameterized as follows

$$\begin{bmatrix}
a_1 & a_2 & a_2 & a_2 & a_2 & a_2 & a_3 & a_3 \\
a_2 & a_1 & a_2 & a_2 & a_2 & a_2 & a_3 & a_3 \\
a_2 & a_2 & a_1 & a_2 & a_2 & a_2 & a_3 & a_3 \\
a_2 & a_2 & a_2 & a_1 & a_2 & a_2 & a_3 & a_3 \\
a_2 & a_2 & a_2 & a_2 & a_1 & a_2 & a_3 & a_3 \\
a_2 & a_2 & a_2 & a_2 & a_2 & a_1 & a_3 & a_3 \\
a_4 & a_4 & a_4 & a_4 & a_4 & a_4 & a_5 & a_6 \\
a_4 & a_4 & a_4 & a_4 & a_4 & a_4 & a_6 & a_5
\end{bmatrix}.$$

The gradient entries, denoted by  $g_1, g_2, g_3, g_4, g_5$  and  $g_6$ , are:

$$\begin{aligned}
g_1 &= \frac{a_1 (d-2)}{2} + \frac{a_1 (d^2 - 5d + 6) \sin(\alpha_{(1)}^{(2)})}{2\pi} + \frac{a_1 \nu_{(d-1)} (d-2) \sin(\alpha_{(1)}^{(d-1)})}{\pi \nu_{(1)}} \\
&- \frac{a_1 (d-2) \sin(\beta_{(1)}^{(1)})}{2\pi \nu_{(1)}} - \frac{a_1 (d-2) \sin(\beta_{(1)}^{(d-1)})}{\pi \nu_{(1)}} \\
&- \frac{a_1 (d^2 - 5d + 6) \sin(\beta_{(1)}^{(2)})}{2\pi \nu_{(1)}} - \frac{a_2 \alpha_{(1)}^{(2)} (d^2 - 5d + 6)}{2\pi} \\
&+ \frac{a_2 (d^2 - 5d + 6)}{2} - \frac{a_4 \alpha_{(1)}^{(d-1)} (d-2)}{\pi} + a_4 (d-2) + \frac{\beta_{(1)}^{(1)} (d-2)}{2\pi} - \frac{d}{2} + 1,
\end{aligned}$$

$$\begin{aligned}
g_2 = & -\frac{a_1 \alpha_{(1)}^{(2)} (d^2 - 5d + 6)}{2\pi} + \frac{a_1 (d^2 - 5d + 6)}{2} - \frac{a_2 \alpha_{(1)}^{(2)} (d^3 - 9d^2 + 26d - 24)}{2\pi} \\
& + \frac{a_2 (d^3 - 8d^2 + 21d - 18) \sin(\alpha_{(1)}^{(2)})}{2\pi} + \frac{a_2 (d^3 - 8d^2 + 21d - 18)}{2} \\
& + \frac{a_2 \nu_{(d-1)} (d^2 - 5d + 6) \sin(\alpha_{(1)}^{(d-1)})}{\pi \nu_{(1)}} - \frac{a_2 (d^2 - 5d + 6) \sin(\beta_{(1)}^{(1)})}{2\pi \nu_{(1)}} \\
& - \frac{a_2 (d^2 - 5d + 6) \sin(\beta_{(1)}^{(d-1)})}{\pi \nu_{(1)}} - \frac{a_2 (d^3 - 8d^2 + 21d - 18) \sin(\beta_{(1)}^{(2)})}{2\pi \nu_{(1)}} \\
& - \frac{a_4 \alpha_{(1)}^{(d-1)} (d^2 - 5d + 6)}{\pi} + a_4 (d^2 - 5d + 6) + \frac{\beta_{(1)}^{(2)} (d^2 - 5d + 6)}{2\pi} - \frac{d^2}{2} + \frac{5d}{2} - 3, \\
g_3 = & -\frac{a_3 \alpha_{(1)}^{(2)} (d^2 - 5d + 6)}{\pi} + \frac{a_3 (d^2 - 5d + 6) \sin(\alpha_{(1)}^{(2)})}{\pi} \\
& + a_3 (d^2 - 4d + 4) + \frac{2a_3 \nu_{(d-1)} (d-2) \sin(\alpha_{(1)}^{(d-1)})}{\pi \nu_{(1)}} - \frac{a_3 (d-2) \sin(\beta_{(1)}^{(1)})}{\pi \nu_{(1)}} \\
& - \frac{2a_3 (d-2) \sin(\beta_{(1)}^{(d-1)})}{\pi \nu_{(1)}} - \frac{a_3 (d^2 - 5d + 6) \sin(\beta_{(1)}^{(2)})}{\pi \nu_{(1)}} - \frac{a_5 \alpha_{(1)}^{(d-1)} (d-2)}{\pi} \\
& + a_5 (d-2) - \frac{a_6 \alpha_{(1)}^{(d-1)} (d-2)}{\pi} + a_6 (d-2) + \frac{\beta_{(1)}^{(d-1)} (d-2)}{\pi} - d + 2, \\
g_4 = & -\frac{a_1 \alpha_{(1)}^{(d-1)} (d-2)}{\pi} + a_1 (d-2) - \frac{a_2 \alpha_{(1)}^{(d-1)} (d^2 - 5d + 6)}{\pi} \\
& + a_2 (d^2 - 5d + 6) - \frac{a_4 \alpha_{(d-1)}^{(d)} (d-2)}{\pi} + \frac{a_4 \nu_{(1)} (d^2 - 4d + 4) \sin(\alpha_{(1)}^{(d-1)})}{\pi \nu_{(d-1)}} \\
& + \frac{a_4 (d-2) \sin(\alpha_{(d-1)}^{(d)})}{\pi} + 2a_4 (d-2) - \frac{a_4 (d-2) \sin(\beta_{(d-1)}^{(d)})}{\pi \nu_{(d-1)}} \\
& - \frac{a_4 (d-2) \sin(\beta_{(d-1)}^{(d-1)})}{\pi \nu_{(d-1)}} - \frac{a_4 (d^2 - 4d + 4) \sin(\beta_{(d-1)}^{(1)})}{\pi \nu_{(d-1)}} + \frac{\beta_{(d-1)}^{(1)} (d-2)}{\pi} - d + 2, \\
g_5 = & -\frac{a_3 \alpha_{(1)}^{(d-1)} (d-2)}{\pi} + a_3 (d-2) + \frac{a_5 \nu_{(1)} (d-2) \sin(\alpha_{(1)}^{(d-1)})}{\pi \nu_{(d-1)}} + \frac{a_5 \sin(\alpha_{(d-1)}^{(d)})}{\pi} + a_5 \\
& - \frac{a_5 (d-2) \sin(\beta_{(d-1)}^{(1)})}{\pi \nu_{(d-1)}} - \frac{a_5 \sin(\beta_{(d-1)}^{(d)})}{\pi \nu_{(d-1)}} - \frac{a_5 \sin(\beta_{(d-1)}^{(d-1)})}{\pi \nu_{(d-1)}} - \frac{a_6 \alpha_{(d-1)}^{(d)}}{\pi} + a_6 + \frac{\beta_{(d-1)}^{(d-1)}}{\pi} - 1 \\
g_6 = & -\frac{a_3 \alpha_{(1)}^{(d-1)} (d-2)}{\pi} + a_3 (d-2) - \frac{a_5 \alpha_{(d-1)}^{(d)}}{\pi} + a_5 \\
& + \frac{a_6 \nu_{(1)} (d-2) \sin(\alpha_{(1)}^{(d-1)})}{\pi \nu_{(d-1)}} + \frac{a_6 \sin(\alpha_{(d-1)}^{(d)})}{\pi} + a_6 \\
& - \frac{a_6 (d-2) \sin(\beta_{(d-1)}^{(1)})}{\pi \nu_{(d-1)}} - \frac{a_6 \sin(\beta_{(d-1)}^{(d)})}{\pi \nu_{(d-1)}} - \frac{a_6 \sin(\beta_{(d-1)}^{(d-1)})}{\pi \nu_{(d-1)}} + \frac{\beta_{(d-1)}^{(d)}}{\pi} - 1.
\end{aligned}$$

### C.3 Gradient expressions for $\mathcal{W}_3$

The space  $\mathcal{W}_3$  is six-dimensional. A weight matrix for  $d = 8$  can be parameterized as follows

$$\begin{bmatrix} a_1 & a_2 & a_2 & a_2 & a_2 & a_3 & a_3 & a_3 \\ a_2 & a_1 & a_2 & a_2 & a_2 & a_3 & a_3 & a_3 \\ a_2 & a_2 & a_1 & a_2 & a_2 & a_3 & a_3 & a_3 \\ a_2 & a_2 & a_2 & a_1 & a_2 & a_3 & a_3 & a_3 \\ a_2 & a_2 & a_2 & a_2 & a_1 & a_3 & a_3 & a_3 \\ a_4 & a_4 & a_4 & a_4 & a_4 & a_5 & a_6 & a_6 \\ a_4 & a_4 & a_4 & a_4 & a_4 & a_6 & a_5 & a_6 \\ a_4 & a_4 & a_4 & a_4 & a_4 & a_6 & a_6 & a_5 \end{bmatrix}$$

The gradient entries, denoted by  $g_1, g_2, g_3, g_4, g_5$  and  $g_6$ , are:

$$\begin{aligned} g_1 &= \frac{a_1(d-3)}{2} + \frac{a_1(d^2-7d+12)\sin(\alpha_{(1)}^{(2)})}{2\pi} + \frac{3a_1\nu_{(d-2)}(d-3)\sin(\alpha_{(1)}^{(d-2)})}{2\pi\nu_{(1)}} \\ &\quad - \frac{a_1(d-3)\sin(\beta_{(1)}^{(1)})}{2\pi\nu_{(1)}} - \frac{3a_1(d-3)\sin(\beta_{(1)}^{(d-2)})}{2\pi\nu_{(1)}} \\ &\quad - \frac{a_1(d^2-7d+12)\sin(\beta_{(1)}^{(2)})}{2\pi\nu_{(1)}} - \frac{a_2\alpha_{(1)}^{(2)}(d^2-7d+12)}{2\pi} + \frac{a_2(d^2-7d+12)}{2} \\ &\quad - \frac{3a_4\alpha_{(1)}^{(d-2)}(d-3)}{2\pi} + \frac{3a_4(d-3)}{2} + \frac{\beta_{(1)}^{(1)}(d-3)}{2\pi} - \frac{d}{2} + \frac{3}{2}, \\ g_2 &= -\frac{a_1\alpha_{(1)}^{(2)}(d^2-7d+12)}{2\pi} + \frac{a_1(d^2-7d+12)}{2} - \frac{a_2\alpha_{(1)}^{(2)}(d^3-12d^2+47d-60)}{2\pi} \\ &\quad + \frac{a_2(d^3-11d^2+40d-48)\sin(\alpha_{(1)}^{(2)})}{2\pi} + \frac{a_2(d^3-11d^2+40d-48)}{2} \\ &\quad + \frac{3a_2\nu_{(d-2)}(d^2-7d+12)\sin(\alpha_{(1)}^{(d-2)})}{2\pi\nu_{(1)}} - \frac{a_2(d^2-7d+12)\sin(\beta_{(1)}^{(1)})}{2\pi\nu_{(1)}} \\ &\quad - \frac{3a_2(d^2-7d+12)\sin(\beta_{(1)}^{(d-2)})}{2\pi\nu_{(1)}} - \frac{a_2(d^3-11d^2+40d-48)\sin(\beta_{(1)}^{(2)})}{2\pi\nu_{(1)}} \\ &\quad - \frac{3a_4\alpha_{(1)}^{(d-2)}(d^2-7d+12)}{2\pi} + \frac{3a_4(d^2-7d+12)}{2} + \frac{\beta_{(1)}^{(2)}(d^2-7d+12)}{2\pi} - \frac{d^2}{2} + \frac{7d}{2} - 6, \\ g_3 &= -\frac{3a_3\alpha_{(1)}^{(2)}(d^2-7d+12)}{2\pi} + \frac{3a_3(d^2-7d+12)\sin(\alpha_{(1)}^{(2)})}{2\pi} + \frac{3a_3(d^2-6d+9)}{2} \\ &\quad + \frac{9a_3\nu_{(d-2)}(d-3)\sin(\alpha_{(1)}^{(d-2)})}{2\pi\nu_{(1)}} - \frac{3a_3(d-3)\sin(\beta_{(1)}^{(1)})}{2\pi\nu_{(1)}} - \frac{9a_3(d-3)\sin(\beta_{(1)}^{(d-2)})}{2\pi\nu_{(1)}} \\ &\quad - \frac{3a_3(d^2-7d+12)\sin(\beta_{(1)}^{(2)})}{2\pi\nu_{(1)}} - \frac{3a_5\alpha_{(1)}^{(d-2)}(d-3)}{2\pi} + \frac{3a_5(d-3)}{2} - \frac{3a_6\alpha_{(1)}^{(d-2)}(d-3)}{\pi} \\ &\quad + 3a_6(d-3) + \frac{3\beta_{(1)}^{(d-2)}(d-3)}{2\pi} - \frac{3d}{2} + \frac{9}{2}, \end{aligned}$$

$$\begin{aligned}
g_4 &= -\frac{3a_1\alpha_{(1)}^{(d-2)}(d-3)}{2\pi} + \frac{3a_1(d-3)}{2} - \frac{3a_2\alpha_{(1)}^{(d-2)}(d^2-7d+12)}{2\pi} \\
&+ \frac{3a_2(d^2-7d+12)}{2} - \frac{3a_4\alpha_{(d-2)}^{(d-1)}(d-3)}{\pi} + \frac{3a_4\nu_{(1)}(d^2-6d+9)\sin(\alpha_{(1)}^{(d-2)})}{2\pi\nu_{(d-2)}} \\
&+ \frac{3a_4(d-3)\sin(\alpha_{(d-2)}^{(d-1)})}{\pi} + \frac{9a_4(d-3)}{2} - \frac{3a_4(d-3)\sin(\beta_{(d-2)}^{(d-1)})}{\pi\nu_{(d-2)}} \\
&- \frac{3a_4(d-3)\sin(\beta_{(d-2)}^{(d-2)})}{2\pi\nu_{(d-2)}} - \frac{3a_4(d^2-6d+9)\sin(\beta_{(d-2)}^{(1)})}{2\pi\nu_{(d-2)}} + \frac{3\beta_{(d-2)}^{(1)}(d-3)}{2\pi} - \frac{3d}{2} + \frac{9}{2}, \\
g_5 &= -\frac{3a_3\alpha_{(1)}^{(d-2)}(d-3)}{2\pi} + \frac{3a_3(d-3)}{2} + \frac{3a_5\nu_{(1)}(d-3)\sin(\alpha_{(1)}^{(d-2)})}{2\pi\nu_{(d-2)}} \\
&+ \frac{3a_5\sin(\alpha_{(d-2)}^{(d-1)})}{\pi} + \frac{3a_5}{2} - \frac{3a_5(d-3)\sin(\beta_{(d-2)}^{(1)})}{2\pi\nu_{(d-2)}} - \frac{3a_5\sin(\beta_{(d-2)}^{(d-1)})}{\pi\nu_{(d-2)}} \\
&- \frac{3a_5\sin(\beta_{(d-2)}^{(d-2)})}{2\pi\nu_{(d-2)}} - \frac{3a_6\alpha_{(d-2)}^{(d-1)}}{\pi} + 3a_6 + \frac{3\beta_{(d-2)}^{(d-2)}}{2\pi} - \frac{3}{2}, \\
g_6 &= -\frac{3a_3\alpha_{(1)}^{(d-2)}(d-3)}{\pi} + 3a_3(d-3) - \frac{3a_5\alpha_{(d-2)}^{(d-1)}}{\pi} + 3a_5 - \frac{3a_6\alpha_{(d-2)}^{(d-1)}}{\pi} \\
&+ \frac{3a_6\nu_{(1)}(d-3)\sin(\alpha_{(1)}^{(d-2)})}{\pi\nu_{(d-2)}} + \frac{6a_6\sin(\alpha_{(d-2)}^{(d-1)})}{\pi} + 6a_6 \\
&- \frac{3a_6(d-3)\sin(\beta_{(d-2)}^{(1)})}{\pi\nu_{(d-2)}} - \frac{6a_6\sin(\beta_{(d-2)}^{(d-1)})}{\pi\nu_{(d-2)}} - \frac{3a_6\sin(\beta_{(d-2)}^{(d-2)})}{\pi\nu_{(d-2)}} + \frac{3\beta_{(d-2)}^{(d-1)}}{\pi} - 3.
\end{aligned}$$

## D Hessian spectrum

Below, we describe the technique we use to derive an analytic description of the Hessian spectrum. Some parts follow [4] verbatim. In order to avoid a long preliminaries section, key ideas and concepts are introduced and organized so as to illuminate our strategy for analyzing the Hessian. We illustrate with reference to the global minimum  $W = V$  where  $d = k$ , the second layer is all ones, and the target weight matrix  $V$  is the identity  $I_d$ . In Section E, we provide the eigenvalue expressions for  $\Delta(S_{d-1} \times S_1)$ , organized by their isotypic component.

### D.1 Studying invariance properties via group action

We first review background material on group actions and fix notations (see [20, Chapters 1, 2] for a more complete account). Elementary concepts from group theory are assumed known. We start with two examples that are used later.

**Examples 1.** (1) The *symmetric group*  $S_d$ ,  $d \in \mathbb{N}$ , is the group of permutations of  $[d] \doteq \{1, \dots, d\}$ . (2) Let  $\text{GL}(d, \mathbb{R})$  denote the space of invertible linear maps on  $\mathbb{R}^d$ . Under composition,  $\text{GL}(d, \mathbb{R})$  has the structure of a group. The *orthogonal group*  $\text{O}(d)$  is the subgroup of  $\text{GL}(d, \mathbb{R})$  defined by  $\text{O}(d) = \{A \in \text{GL}(d, \mathbb{R}) \mid \|Ax\| = \|x\|, \text{ for all } x \in \mathbb{R}^d\}$ . Both  $\text{GL}(d, \mathbb{R})$  and  $\text{O}(d)$  can be viewed as groups of invertible  $d \times d$  matrices.

Characteristically, these groups consist of *transformations* of a set and so we are led to the notion of a *G-space*  $X$  where we have an *action* of a group  $G$  on a set  $X$ . Formally, this is a group homomorphism from  $G$  to the group of bijections of  $X$ . For example,  $S_d$  naturally acts on  $[d]$  as permutations and both  $\text{GL}(d, \mathbb{R})$  and  $\text{O}(d)$  act on  $\mathbb{R}^d$  as linear transformations (or matrix multiplication).

An example, which we use extensively in studying the invariance properties of  $\mathcal{L}$ , is given by the action of the group  $S_k \times S_d \subset S_{k \times d}$ ,  $k, d \in \mathbb{N}$ , on  $[k] \times [d]$  defined by

$$(\pi, \rho)(i, j) = (\pi^{-1}(i), \rho^{-1}(j)), \quad \pi \in S_k, \rho \in S_d, (i, j) \in [k] \times [d]. \quad (14)$$

This action induces an action on the space  $M(k, d)$  of  $k \times d$ -matrices  $A = [A_{ij}]$  by  $(\pi, \rho)[A_{ij}] = [A_{\pi^{-1}(i), \rho^{-1}(j)}]$ . The action can be defined in terms of permutation matrices but is easier to describe in terms of rows and columns:  $(\pi, \rho)A$  permutes rows (resp. columns) of  $A$  according to  $\pi$  (resp.  $\rho$ ). As mentioned in the introduction, for our choice of  $V = I_d$ ,  $\mathcal{L}$  is  $S_k \times S_d$ -invariant. Note that  $\Delta S_d \approx S_d$ . When we restrict the  $S_d \times S_d$ -action on  $M(k, k)$  to  $\Delta S_d$ , we refer to the diagonal  $S_d$ -action, or just the  $S_d$ -action on  $M(d, d)$ . This action of  $S_d$  on  $M(d, d)$  maps diagonal matrices to diagonal matrices and should not be confused with the actions of  $S_d$  on  $M(d, d)$  defined by either permuting rows or columns.

**Example 2.** Take  $p, q \in \mathbb{N}$ ,  $p + q = d$ , and consider the diagonal action of  $S_p \times S_q \subset S_d$  on  $M(d, d)$ .

Write  $A \in M(d, d)$  in block matrix form as  $A = \begin{bmatrix} A_{p,p} & A_{p,q} \\ A_{q,p} & A_{q,q} \end{bmatrix}$ . If  $(g, h) \in S_p \times S_q \subset S_d$ , then

$(g, h)A = \begin{bmatrix} gA_{p,p} & (g, h)A_{p,q} \\ (h, g)A_{q,p} & hA_{q,q} \end{bmatrix}$  where  $gA_{p,p}$  (resp.  $hA_{q,q}$ ) are defined via the diagonal action of  $S_p$  (resp.  $S_q$ ) on  $A_{p,p}$  (resp.  $A_{q,q}$ ), and  $(g, h)A_{p,q}$  and  $(h, g)A_{q,p}$  are defined through the natural action of  $S_p \times S_q$  on rows and columns. Thus, for  $(g, h)A_{p,q}$  (resp.  $(h, g)A_{q,p}$ ) we permute rows (resp. columns) according to  $g$  and columns (resp. rows) according to  $h$ . In the case when  $p = d - 1$ ,  $q = 1$ ,  $S_{d-1}$  will act diagonally on  $A_{d-1, d-1}$ , fix  $a_{dd}$ , and act by permuting the first  $(d - 1)$  entries of the last row and column.

As mentioned in body of the paper, given  $W \in M(d, d)$ , the largest subgroup of  $S_d \times S_d$  fixing  $W$  is called the *isotropy* subgroup of  $W$  and is used as means of measuring the symmetry of  $W$ . The isotropy subgroup of  $V \in M(d, d)$  is the diagonal subgroup  $\Delta S_d$ . Our focus will be on critical points  $W$  whose isotropy groups are subgroups of the target matrix  $V = I_d$ , that is,  $\Delta S_d$  and  $\Delta(S_{d-1} \times S_1)$  (see Figure 2—we use the notation  $\Delta S_d$  as the isotropy is a *subgroup* of  $S_d \times S_d$ ). In the next section, we show how the symmetry of local minima greatly simplifies the analysis of their Hessian.

## D.2 The spectrum of equivariant linear isomorphisms

If  $G$  is a subgroup of  $O(d)$ , the action on  $\mathbb{R}^d$  is called an *orthogonal* representation of  $G$  (we often drop the qualifier orthogonal). Denote by  $(\mathbb{R}^d, G)$  as necessary. The *degree* of a representation  $(V, G)$  is the dimension of  $V$  ( $V$  will always be a linear subspace of some  $\mathbb{R}^n$  with the induced Euclidean inner product). The action of  $S_k \times S_d \subset S_{k \times d}$  on  $M(k, d)$  is orthogonal with respect to the standard Euclidean inner product on  $M(k, d) \approx \mathbb{R}^{k \times d}$  since the action permutes the coordinates of  $\mathbb{R}^{k \times d}$  (equivalently, components of  $k \times d$  matrices). Given two representations  $(V, G)$  and  $(W, G)$ , a map  $A : V \rightarrow W$  is called  $G$ -equivariant if  $A(gv) = gA(v)$ , for all  $g \in G, v \in V$ . If  $A$  is linear and equivariant, we say  $A$  is a  $G$ -map. Invariant functions naturally provide examples of equivariant maps. Thus the gradient  $\nabla \mathcal{L}$  is a  $S_k \times S_d$ -equivariant self map of  $M(k, d)$  and if  $W$  is a critical point of  $\nabla \mathcal{L}$  with isotropy  $G \subset S_k \times S_d$ , then  $\nabla^2 \mathcal{L}(W) : M(k, d) \rightarrow M(k, d)$  is a  $G$ -map (see [6]). The equivariance of the Hessian is the key ingredient that allows us to study the spectral density at *symmetric* local minima.

A representation  $(\mathbb{R}^n, G)$  is *irreducible* if the only linear subspaces of  $\mathbb{R}^n$  that are preserved (invariant) by the  $G$ -action are  $\mathbb{R}^n$  and  $\{0\}$ . Two orthogonal representations  $(V, G)$ ,  $(W, G)$  are *isomorphic* (and have the same *isomorphism class*) if there exists a  $G$ -map  $A : V \rightarrow W$  which is a linear isomorphism. If  $(V, G)$ ,  $(W, G)$  are irreducible but not isomorphic then every  $G$ -map  $A : V \rightarrow W$  is zero (as the kernel and the image of a  $G$ -map are  $G$ -invariant). If  $(V, G)$  is irreducible, then the space  $\text{Hom}_G(V, V)$  of  $G$ -maps (endomorphisms) of  $V$  is a real associative division algebra and is isomorphic by a theorem of Frobenius to either  $\mathbb{R}$ ,  $\mathbb{C}$  or  $\mathbb{H}$  (the quaternions). The *only* case that will concern us here is when  $\text{Hom}_G(V, V) \approx \mathbb{R}$  when we say the representation is *real*.

**Example 3.** Let  $n > 1$ . Take the natural (orthogonal) action of  $S_n$  on  $\mathbb{R}^n$  defined by permuting coordinates. The representation is not irreducible since the subspace  $T = \{(x, x, \dots, x) \in \mathbb{R}^n \mid x \in \mathbb{R}\}$  is invariant by the action of  $S_n$ , as is the hyperplane  $H_{n-1} = T^\perp = \{(x_1, \dots, x_n) \mid \sum_{i \in [n]} x_i = 0\}$ . It is easy to check that  $(T, S_n)$ , also called the *trivial* representation of  $S_n$ , and  $(H_{n-1}, S_n)$ , the *standard* representation, are irreducible, real, and not isomorphic.



Every representation  $(\mathbb{R}^n, G)$  can be written uniquely, up to order, as an orthogonal direct sum  $\bigoplus_{i \in [m]} V_i$ , where each  $(V_i, G)$  is an orthogonal direct sum of isomorphic irreducible representations  $(V_{ij}, G)$ ,  $j \in [p_i]$ , and  $(V_{ij}, G)$  is isomorphic to  $(V_{i'j'}, G)$  if and only if  $i' = i$ . The subspaces  $V_{ij}$  are *not* uniquely determined if  $p_i > 1$ . If there are  $m$  distinct isomorphism classes  $\mathfrak{v}_1, \dots, \mathfrak{v}_m$  of irreducible representations, then  $(\mathbb{R}^n, G)$  may be represented by the sum  $p_1 \mathfrak{v}_1 + \dots + p_m \mathfrak{v}_m$ , where  $p_i \geq 1$  counts the number of representations with isomorphism class  $\mathfrak{v}_i$ . Up to order, this sum (that is, the  $\mathfrak{v}_i$  and their multiplicities) is uniquely determined by  $(\mathbb{R}^n, G)$ . This is the *isotypic decomposition* of  $(\mathbb{R}^n, G)$  (see [60]). The isotypic decomposition is a powerful tool for extracting information about the spectrum of  $G$ -maps.

If  $G = S_d$ , then every irreducible representation of  $S_d$  is real [22, Thm. 4.3]. Suppose, as above, that  $(\mathbb{R}^n, S_d) = \bigoplus_{i \in [m]} V_i$  and  $A : \mathbb{R}^n \rightarrow \mathbb{R}^n$  is an  $S_d$ -map. Since the induced maps  $A_{ii'} : V_i \rightarrow V_{i'}$  must be zero if  $i \neq i'$ ,  $A$  is uniquely determined by the  $S_d$ -maps  $A_{ii} : V_i \rightarrow V_i$ ,  $i \in [m]$ . Fix  $i$  and choose an  $S_d$ -representation  $(W, S_d)$  in the isomorphism class  $\mathfrak{v}_i$ . Choose  $S_d$ -isomorphisms  $W \rightarrow V_{ij}$ ,  $j \in [p_i]$ . Then  $A_{ii}$  induces  $\bar{A}_{ii} : W^{p_i} \rightarrow W^{p_i}$  and so determines a (real) matrix  $M_i \in M(p_i, p_i)$  since  $\text{Hom}_{S_d}(W, W) \approx \mathbb{R}$ . Different choices of  $V_{ij}$ , or isomorphism  $W \rightarrow V_{ij}$ , yield a matrix similar to  $M_i$ . Each eigenvalue of  $M_i$  of multiplicity  $r$  gives an eigenvalue of  $A_{ii}$ , and so of  $A$ , of multiplicity  $r \text{degree}(\mathfrak{v}_i)$ .

**Fact 1.** (Notations and assumptions as above.) If  $A$  is the Hessian, all eigenvalues are real and each eigenvalue of  $M_i$  of multiplicity  $r$  will be an eigenvalue of  $A$  with multiplicity  $r \text{degree}(\mathfrak{v}_i)$ . In particular,  $A$  has most  $\sum_{i \in [m]} p_i$  distinct real eigenvalues—regardless of the dimension of the underlying space.

Our strategy can be now summarized as follows. Given a local minima  $W$ , we compute the isotropy group  $G \subset S_k \times S_d$  of  $W$ . Since the Hessian of  $\mathcal{F}$  at  $W$  is a  $G$ -map, may use the isotypic decomposition of the action of  $G$  on  $M(k, d)$  to extract the spectral properties of the Hessian. In our setting, local minima have large isotropy groups, typically, as large as  $\Delta(S_p \times S_{d-p})$ ,  $0 \leq p < d/2$ . Studying the Hessian at these minima requires the isotopic decomposition corresponding to  $\Delta(S_p \times S_{d-p})$ ,  $0 \leq p < d/2$ , which we detail in [Theorem D.3](#) below.

### D.3 The isotypic decomposition of $(M(d, d), S_d)$ and the spectrum at $W = V$

Regard  $M(d, d)$  as an  $S_d$ -space (diagonal action). The trivial representation, denoted by  $\mathfrak{t}_d$ , and the standard representation, denoted by  $\mathfrak{s}_d$ , introduced in [Example 3](#) are examples of the many irreducible representations of  $S_d$ . In the general theory, each irreducible representation of  $S_d$  is associated to a partition of the set  $[d]$ . The description of the isotypic decomposition of  $(M(d, d), S_d)$  is relatively simple and uses just 4 irreducible representations of  $S_d$  for  $d \geq 4$ .

- The trivial representation  $\mathfrak{t}_d$  of degree 1.
- The standard representation  $\mathfrak{s}_d$  of  $S_d$  of degree  $k - 1$ .
- The exterior square representation  $\mathfrak{r}_d = \wedge^2 \mathfrak{s}_d$  of degree  $\frac{(d-1)(d-2)}{2}$ .
- A representation  $\eta_d$  of degree  $\frac{d(d-3)}{2}$ . We describe  $\eta_d$  explicitly later in terms of symmetric matrices (formally, it is the representation associated to the partition  $(d - 2, 2)$ ).

We omit the subscript  $d$  when clear from the context. Assume that  $d \geq 4$ . We begin with a well-known result about the representation  $\mathfrak{s} \otimes \mathfrak{s}$  (see, e.g., [22]). If  $\mathfrak{s} \odot \mathfrak{s}$  denotes the symmetric tensor product of  $\mathfrak{s}$ , then

$$\mathfrak{s} \otimes \mathfrak{s} = \mathfrak{s} \odot \mathfrak{s} + \mathfrak{r} = \mathfrak{t} + \mathfrak{s} + \eta + \mathfrak{r}. \quad (15)$$

Since all the irreducible  $S_d$ -representations are real, they are isomorphic to their dual representations and so we have the isotypic decomposition

$$M(k, k) \approx \mathbb{R}^k \otimes \mathbb{R}^k \approx (\mathfrak{s} + \mathfrak{t}) \otimes (\mathfrak{s} + \mathfrak{t}) = 2\mathfrak{t} + 3\mathfrak{s} + \mathfrak{r} + \eta, \quad (16)$$

since  $\mathfrak{t} \otimes \mathfrak{s} = \mathfrak{s}$  and  $\mathfrak{t} \otimes \mathfrak{t} = \mathfrak{t}$ .

Using [Fact 1](#), information can immediately be deduced from [Equation \(16\)](#). For example, if  $W$  is a critical point of isotropy  $\Delta S_d$  (a fixed point of the  $S_d$ -action on  $M(d, d)$ ), then the spectrum of the Hessian contains at most  $2 + 3 + 1 + 1 = 7$  distinct eigenvalues which distribute as follows:  $\mathfrak{t}$  contributes 2 eigenvalues of multiplicity 1,  $\mathfrak{s}$  contributes 2 eigenvalues of multiplicity  $d - 1$ ,  $\mathfrak{r}$

contributes one eigenvalue of multiplicity  $\frac{(d-1)(d-2)}{2}$ , and  $\eta$  contributes one eigenvalue of multiplicity  $\frac{d(d-3)}{2}$ . This applies to the global minimum  $W = V$  and the spurious minimum of type A.

Next, we would like to compute the actual eigenvalues. We demonstrate the method for the single  $\mathfrak{r}$ -eigenvalue (the example given in the body of the paper in section [Section 4.2](#) refers to the single  $\eta$ -eigenvalue). Pick a non-zero vector from the  $\mathfrak{r}$ -representation. For example,

$$\mathfrak{X}^d = \begin{bmatrix} 0 & 1 & \dots & 1 & -(d-2) \\ -1 & 0 & \dots & 0 & 1 \\ \dots & \dots & \dots & \dots & \dots \\ -1 & 0 & \dots & 0 & 1 \\ (d-2) & -1 & \dots & -1 & 0 \end{bmatrix},$$

where rows and columns sum to zero and the only non-zero entries are in rows and columns 1 and  $d$ . Let  $\overline{\mathfrak{X}}^d \in \mathbb{R}^{d \times d}$  be defined by concatenating the rows of  $\mathfrak{X}^d$ . Since  $\mathfrak{r}$  only occurs once in the isotopic decomposition and  $\nabla^2 \mathcal{L}(V)$  is  $S_d$ -equivariant,  $\overline{\mathfrak{X}}^d$  must be an eigenvector. In particular,  $(\nabla^2 \mathcal{L}(V) \overline{\mathfrak{X}}^d)_i = \lambda_{\mathfrak{r}} \overline{\mathfrak{X}}^d_i$ , all  $i \in [d^2]$ . Choose  $i$  so that  $\overline{\mathfrak{X}}^d_i \neq 0$ . For example,  $\overline{\mathfrak{X}}^d_2 = 1$ . Matrix multiplication, yields  $\lambda_{\mathfrak{r}} = 1/4 - 1/2\pi$ . A similar analysis holds for the eigenvalue associated to  $\eta$ . The multiple factors  $2\mathfrak{t}$  and  $3\mathfrak{s}$  are handled by making judicious choices of orthogonal invariant subspaces and representative vectors in  $M(k, k)$ .

Having described the general strategy for analyzing the Hessian spectrum for global minima, we now examine the spectrum at various types of spurious minima. We need two additional ingredients: a specification of the entries of a given family of spurious minima and the respective isotopic decomposition; we begin with the latter.

As discussed in the body of the paper, the symmetry-based analysis of the Hessian relies on the fact that isotropy groups of spurious minima tend to be (and some provably are) maximal subgroups of the target matrix isotropy. For  $V = I$ , the relevant maximal isotropy groups are of the form  $\Delta(S_p \times S_q)$ ,  $p + q = d$ . Below, we provide the corresponding isotopic decomposition. Assume  $d = k$  and regard  $M(d, d)$  as an  $S_p \times S_q$ -space, where  $S_p \times S_q \subset S_d$  and the (diagonal) action of  $S_d$  is restricted to the subgroup  $S_p \times S_q$ .

**Theorem** ([\[4, Theorem 4\]](#)). *The isotopic decomposition of  $(M(d, d), S_p \times S_q)$  is given by:*

1. If  $p = d - 1$ ,  $q = 1$ , and  $k \geq 5$ ,

$$M(d, d) = 5\mathfrak{t} + 5\mathfrak{s}_{d-1} + \mathfrak{r}_{d-1} + \eta_{d-1}.$$

2. If  $q \geq 2$ ,  $d - 1 > p > p/2$  and  $d \geq 4 + q$ , then

$$M(d, d) = 6\mathfrak{t} + 5\mathfrak{s}_p + a\mathfrak{s}_q + \mathfrak{r}_p + \eta_p + b\mathfrak{r}_q + c\eta_q + 2\mathfrak{s}_p \boxtimes \mathfrak{s}_q,$$

where if  $q = 2$ , then  $a = 4, b = c = 0$ ; if  $q = 3$ , then  $a = 5, b = 1, c = 0$ ; and if  $q \geq 4$ , then  $a = 5, b = c = 1$ .

(There is a minor error in [\[4, Theorem 4\]](#). The correct value for  $a$  in the second case is as stated here.)

In contrast to the setting considered in [\[4\]](#), in our case the second layer is trainable. To compute the isotopic decomposition corresponding to this case (i.e.,  $M(d, d) \times \mathbb{R}^d$ ), we simply treat the weights of the second layer as an additional row of the weight matrix of the first layer. The additional row is split into  $p$  entries and  $d - p$  entries. This adds  $\mathfrak{t} + \mathfrak{s}_p$  to the isotopic decomposition if  $q = 0$ ,  $2\mathfrak{t} + \mathfrak{s}_p$  to the isotopic decomposition if  $q = 1$ , and  $2\mathfrak{t} + \mathfrak{s}_p + \mathfrak{s}_q$  otherwise.

**Theorem 4.** *The isotopic decomposition of  $(M(d, d), S_p \times S_q) \otimes (\mathbb{R}^d, S_p \times S_q)$  is given by:*

1. If  $p = d$ ,  $q = 0$ , and  $k \geq 5$ ,

$$M(d, d) = 3\mathfrak{t} + 4\mathfrak{s}_d + \mathfrak{r}_d + \eta_d.$$

2. If  $p = d - 1$ ,  $q = 1$ , and  $k \geq 5$ ,

$$M(d, d) = 7\mathfrak{t} + 6\mathfrak{s}_{d-1} + \mathfrak{r}_{d-1} + \eta_{d-1}.$$

3. If  $q \geq 2$ ,  $d - 1 > p > p/2$  and  $d \geq 4 + q$ , then

$$M(d, d) = 8t + 6s_p + as_q + r_p + \eta_p + br_q + c\eta_q + 2s_p \boxtimes s_q,$$

where if  $q = 2$ , then  $a = 5, b = c = 0$ ; if  $q = 3$ , then  $a = 6, b = 1, c = 0$ ; and if  $q \geq 4$ , then  $a = 6, b = c = 1$ .

**Theorem 4** implies that the Hessian spectrum of local minima (or critical points) with isotropy  $\Delta(S_p \times S_q)$  has at most 9 distinct eigenvalues if (1) applies, at most 15 distinct eigenvalues if (2) applies, and if (3) holds, at most 24 distinct eigenvalues if  $q = 2$ , at most 25 distinct eigenvalues if  $q = 3$ , and at most 26 distinct eigenvalues if  $q \geq 4$ . We omit some less interesting cases when  $k$  is small.

Following the same lines of argument described in [Section D.3](#), the next step is to pick a set of non-zero representative vectors for each irreducible representation that will allow us to compute the spectrum. We adopt the same choice of representative vectors from [4]. We demonstrate the final step with respect to the two trivial factors of  $S_d$  in (16). Let  $\mathfrak{D}_1$  and  $\mathfrak{D}_2$  be the two representatives and let  $\nabla^2 \mathcal{L}(\mathfrak{D}_i) = \alpha_{i1} \mathfrak{D}_1 + \alpha_{i2} \mathfrak{D}_2$ ,  $i = 1, 2$ . The eigenvalues of  $\nabla^2 \mathcal{L}|_{2t}$  are then the eigenvalues of the  $2 \times 2$  transition matrix  $A = [\alpha_{ij}]$ . To compute the eigenvalues of  $A$  to, say,  $O(d^{-1/2})$ -order, one solves the equation

$$\det(A - (x_1 d + x_2 d^{1/2} + x_3)) = 0,$$

for  $x_1, x_2, x_3$ , where sufficiently many coefficients of the power series of the entries of  $A$  are assumed known. The same recipe is used for computing the rest of the eigenvalues.

## E Eigenvalues transition matrices

Below, we provide the explicit form of the eigenvalue transition matrices for the natural representation of  $S_d$ .

**r-rep.** Let the associated  $1 \times 1$  transition matrix be denoted by  $T^r$ . Then,

$$\begin{aligned} T_{1,1}^r = & -\frac{a_1^2}{2\pi\nu_{(1)}^2\nu_{(1)}^{(2)}} + \frac{a_1^2 \sin(\alpha_{(1)}^{(2)})}{2\pi\nu_{(1)}^2 (\nu_{(1)}^{(2)})^2} + \frac{a_1 a_2}{\pi\nu_{(1)}^2\nu_{(1)}^{(2)}} - \frac{a_1 a_2 \sin(\alpha_{(1)}^{(2)})}{\pi\nu_{(1)}^2 (\nu_{(1)}^{(2)})^2} \\ & - \frac{a_2^2}{2\pi\nu_{(1)}^2\nu_{(1)}^{(2)}} + \frac{a_2^2 \sin(\alpha_{(1)}^{(2)})}{2\pi\nu_{(1)}^2 (\nu_{(1)}^{(2)})^2} + \frac{\alpha_{(1)}^{(2)}}{2\pi} + \frac{(d-1) \sin(\alpha_{(1)}^{(2)})}{2\pi} \\ & - \frac{(d-1) \sin(\beta_{(1)}^{(2)})}{2\pi\nu_{(1)}} - \frac{\sin(\beta_{(1)}^{(1)})}{2\pi\nu_{(1)}} - \frac{\sin(\beta_{(1)}^{(2)})}{2\pi (\mu_{(1)}^{(2)})^2 \nu_{(1)}}. \end{aligned}$$

**$\eta$ -rep.** Let the associated  $1 \times 1$  transition matrix be denoted by  $T^\eta$ . Then,

$$\begin{aligned} T_{1,1}^\eta = & \frac{a_1^2}{2\pi\nu_{(1)}^2\nu_{(1)}^{(2)}} + \frac{a_1^2 \sin(\alpha_{(1)}^{(2)})}{2\pi\nu_{(1)}^2 (\nu_{(1)}^{(2)})^2} - \frac{a_1 a_2}{\pi\nu_{(1)}^2\nu_{(1)}^{(2)}} - \frac{a_1 a_2 \sin(\alpha_{(1)}^{(2)})}{\pi\nu_{(1)}^2 (\nu_{(1)}^{(2)})^2} + \frac{a_2^2}{2\pi\nu_{(1)}^2\nu_{(1)}^{(2)}} + \frac{a_2^2 \sin(\alpha_{(1)}^{(2)})}{2\pi\nu_{(1)}^2 (\nu_{(1)}^{(2)})^2} \\ & + \frac{\alpha_{(1)}^{(2)}}{2\pi} + \frac{(d-1) \sin(\alpha_{(1)}^{(2)})}{2\pi} - \frac{(d-1) \sin(\beta_{(1)}^{(2)})}{2\pi\nu_{(1)}} - \frac{\sin(\beta_{(1)}^{(1)})}{2\pi\nu_{(1)}} - \frac{\sin(\beta_{(1)}^{(2)})}{2\pi (\mu_{(1)}^{(2)})^2 \nu_{(1)}}. \end{aligned}$$

**s-rep.** Let the associated  $4 \times 4$  transition matrix be denoted by  $T^s$ . Then,

$$\begin{aligned}
T_{1,1}^s = & -\frac{a_1^2 (d-1) \sin(\alpha_{(1)}^{(2)})}{2\pi\nu_{(1)}^2} - \frac{a_1^2}{2\pi\nu_{(1)}^2\nu_{(1)}^{(2)}} + \frac{a_1^2 (d-1) \sin(\alpha_{(1)}^{(2)}) \cos^2(\alpha_{(1)}^{(2)})}{2\pi\nu_{(1)}^2 (\nu_{(1)}^{(2)})^2} \\
& + \frac{a_1^2 (d-1) \sin(\beta_{(1)}^{(2)})}{2\pi\nu_{(1)}^3} + \frac{a_1^2 \sin(\beta_{(1)}^{(1)})}{2\pi\nu_{(1)}^3} - \frac{a_1^2 (d-1) \sin(\beta_{(1)}^{(2)}) \cos^2(\beta_{(1)}^{(2)})}{2\pi (\mu_{(1)}^{(2)})^2 \nu_{(1)}^3} \\
& - \frac{a_1^2 \sin(\beta_{(1)}^{(1)}) \cos^2(\beta_{(1)}^{(1)})}{2\pi (\mu_{(1)}^{(1)})^2 \nu_{(1)}^3} + \frac{a_1 a_2 \cos(\alpha_{(1)}^{(2)})}{\pi\nu_{(1)}^2\nu_{(1)}^{(2)}} - \frac{a_1 a_2 (d-1) \sin(\alpha_{(1)}^{(2)}) \cos(\alpha_{(1)}^{(2)})}{\pi\nu_{(1)}^2 (\nu_{(1)}^{(2)})^2} \\
& + \frac{a_1 \sin(\beta_{(1)}^{(1)}) \cos(\beta_{(1)}^{(1)})}{\pi (\mu_{(1)}^{(1)})^2 \nu_{(1)}^2} - \frac{a_2^2}{2\pi\nu_{(1)}^2\nu_{(1)}^{(2)}} + \frac{a_2^2 (d-1) \sin(\alpha_{(1)}^{(2)})}{2\pi\nu_{(1)}^2 (\nu_{(1)}^{(2)})^2} \\
& + \frac{(d-1) \sin(\alpha_{(1)}^{(2)})}{2\pi} + \frac{1}{2} - \frac{(d-1) \sin(\beta_{(1)}^{(2)})}{2\pi\nu_{(1)}} - \frac{\sin(\beta_{(1)}^{(1)})}{2\pi\nu_{(1)}} - \frac{\sin(\beta_{(1)}^{(1)})}{2\pi (\mu_{(1)}^{(1)})^2 \nu_{(1)}},
\end{aligned}$$

$$\begin{aligned}
T_{1,2}^s = & \frac{a_1^2 d \cos(\alpha_{(1)}^{(2)})}{2\pi\nu_{(1)}^2\nu_{(1)}^{(2)}} - \frac{a_1^2 d \sin(\alpha_{(1)}^{(2)}) \cos(\alpha_{(1)}^{(2)})}{2\pi\nu_{(1)}^2 (\nu_{(1)}^{(2)})^2} - \frac{a_1 a_2 d}{\pi\nu_{(1)}^2\nu_{(1)}^{(2)}} + \frac{a_1 a_2 d \sin(\alpha_{(1)}^{(2)})}{2\pi\nu_{(1)}^2 (\nu_{(1)}^{(2)})^2} \\
& + \frac{a_1 a_2 d \sin(\beta_{(1)}^{(1)})}{2\pi\nu_{(1)}^3} - \frac{a_1 a_2 d \sin(\beta_{(1)}^{(1)}) \cos^2(\beta_{(1)}^{(1)})}{2\pi (\mu_{(1)}^{(1)})^2 \nu_{(1)}^3} - \frac{a_1 a_2 (d^2 - d) \sin(\alpha_{(1)}^{(2)})}{2\pi\nu_{(1)}^2} \\
& - \frac{a_1 a_2 (d^2 - 2d) \sin(\alpha_{(1)}^{(2)}) \cos(\alpha_{(1)}^{(2)})}{2\pi\nu_{(1)}^2 (\nu_{(1)}^{(2)})^2} + \frac{a_1 a_2 (d^2 - d) \sin(\alpha_{(1)}^{(2)}) \cos^2(\alpha_{(1)}^{(2)})}{2\pi\nu_{(1)}^2 (\nu_{(1)}^{(2)})^2} \\
& + \frac{a_1 a_2 (d^2 - d) \sin(\beta_{(1)}^{(2)})}{2\pi\nu_{(1)}^3} - \frac{a_1 a_2 (d^2 - d) \sin(\beta_{(1)}^{(2)}) \cos^2(\beta_{(1)}^{(2)})}{2\pi (\mu_{(1)}^{(2)})^2 \nu_{(1)}^3} \\
& + \frac{a_1 d \sin(\beta_{(1)}^{(2)}) \cos(\beta_{(1)}^{(2)})}{2\pi (\mu_{(1)}^{(2)})^2 \nu_{(1)}^2} + \frac{a_2^2 d \cos(\alpha_{(1)}^{(2)})}{2\pi\nu_{(1)}^2\nu_{(1)}^{(2)}} + \frac{a_2^2 (d^2 - 2d) \sin(\alpha_{(1)}^{(2)})}{2\pi\nu_{(1)}^2 (\nu_{(1)}^{(2)})^2} \\
& - \frac{a_2^2 (d^2 - d) \sin(\alpha_{(1)}^{(2)}) \cos(\alpha_{(1)}^{(2)})}{2\pi\nu_{(1)}^2 (\nu_{(1)}^{(2)})^2} + \frac{a_2 d \sin(\beta_{(1)}^{(1)}) \cos(\beta_{(1)}^{(1)})}{2\pi (\mu_{(1)}^{(1)})^2 \nu_{(1)}^2} + \frac{\alpha_{(1)}^{(2)} d}{2\pi} - \frac{d}{2},
\end{aligned}$$

$$\begin{aligned}
T_{1,3}^s = & -\frac{a_1^2 (d-2) \cos(\alpha_{(1)}^{(2)})}{2\pi\nu_{(1)}^2\nu_{(1)}^{(2)}} - \frac{a_1^2 (d-2) \sin(\alpha_{(1)}^{(2)}) \cos(\alpha_{(1)}^{(2)})}{2\pi\nu_{(1)}^2 (\nu_{(1)}^{(2)})^2} \\
& - \frac{a_1 a_2 (d^2 - 3d + 2) \sin(\alpha_{(1)}^{(2)})}{2\pi\nu_{(1)}^2} + \frac{a_1 a_2 (d-2) \cos(\alpha_{(1)}^{(2)})}{\pi\nu_{(1)}^2\nu_{(1)}^{(2)}} + \frac{a_1 a_2 (d-2) \sin(\alpha_{(1)}^{(2)})}{2\pi\nu_{(1)}^2 (\nu_{(1)}^{(2)})^2} \\
& - \frac{a_1 a_2 (d^2 - 4d + 4) \sin(\alpha_{(1)}^{(2)}) \cos(\alpha_{(1)}^{(2)})}{2\pi\nu_{(1)}^2 (\nu_{(1)}^{(2)})^2} + \frac{a_1 a_2 (d^2 - 3d + 2) \sin(\alpha_{(1)}^{(2)}) \cos^2(\alpha_{(1)}^{(2)})}{2\pi\nu_{(1)}^2 (\nu_{(1)}^{(2)})^2} \\
& + \frac{a_1 a_2 (d-2) \sin(\beta_{(1)}^{(1)})}{2\pi\nu_{(1)}^3} + \frac{a_1 a_2 (d^2 - 3d + 2) \sin(\beta_{(1)}^{(2)})}{2\pi\nu_{(1)}^3} \\
& - \frac{a_1 a_2 (d^2 - 3d + 2) \sin(\beta_{(1)}^{(2)}) \cos^2(\beta_{(1)}^{(2)})}{2\pi (\mu_{(1)}^{(2)})^2 \nu_{(1)}^3} - \frac{a_1 a_2 (d-2) \sin(\beta_{(1)}^{(1)}) \cos^2(\beta_{(1)}^{(1)})}{2\pi (\mu_{(1)}^{(1)})^2 \nu_{(1)}^3} \\
& + \frac{a_1 (d-2) \sin(\beta_{(1)}^{(2)}) \cos(\beta_{(1)}^{(2)})}{2\pi (\mu_{(1)}^{(2)})^2 \nu_{(1)}^2} + \frac{a_2^2 (d-2) \cos(\alpha_{(1)}^{(2)})}{2\pi\nu_{(1)}^2\nu_{(1)}^{(2)}} - \frac{a_2^2 (d-2)}{\pi\nu_{(1)}^2\nu_{(1)}^{(2)}} \\
& + \frac{a_2^2 (d^2 - 4d + 4) \sin(\alpha_{(1)}^{(2)})}{2\pi\nu_{(1)}^2 (\nu_{(1)}^{(2)})^2} - \frac{a_2^2 (d^2 - 3d + 2) \sin(\alpha_{(1)}^{(2)}) \cos(\alpha_{(1)}^{(2)})}{2\pi\nu_{(1)}^2 (\nu_{(1)}^{(2)})^2} \\
& + \frac{a_2 (d-2) \sin(\beta_{(1)}^{(1)}) \cos(\beta_{(1)}^{(1)})}{2\pi (\mu_{(1)}^{(1)})^2 \nu_{(1)}^2} - \frac{\alpha_{(1)}^{(2)} (d-2)}{2\pi} + \frac{d}{2} - 1,
\end{aligned}$$

$$\begin{aligned}
T_{1,4}^s = & \frac{a_1 (d-2) \sin(\alpha_{(1)}^{(2)})}{2\pi} + a_1 - \frac{a_1 (d-1) \sin(\beta_{(1)}^{(2)})}{2\pi\nu_{(1)}} \\
& - \frac{a_1 \sin(\beta_{(1)}^{(1)})}{2\pi\nu_{(1)}} - \frac{a_2 \alpha_{(1)}^{(2)} (d-2)}{2\pi} + \frac{a_2 (d-2)}{2} + \frac{\beta_{(1)}^{(1)}}{2\pi} - \frac{1}{2},
\end{aligned}$$

$$\begin{aligned}
T_{2,1}^s = & \frac{a_1^2 \cos(\alpha_{(1)}^{(2)})}{4\pi\nu_{(1)}^2\nu_{(1)}^{(2)}} - \frac{a_1^2 \sin(\alpha_{(1)}^{(2)}) \cos(\alpha_{(1)}^{(2)})}{4\pi\nu_{(1)}^2(\nu_{(1)}^{(2)})^2} - \frac{a_1 a_2 (d-1) \sin(\alpha_{(1)}^{(2)})}{4\pi\nu_{(1)}^2} - \frac{a_1 a_2}{2\pi\nu_{(1)}^2\nu_{(1)}^{(2)}} \\
& - \frac{a_1 a_2 (d-2) \sin(\alpha_{(1)}^{(2)}) \cos(\alpha_{(1)}^{(2)})}{4\pi\nu_{(1)}^2(\nu_{(1)}^{(2)})^2} + \frac{a_1 a_2 (d-1) \sin(\alpha_{(1)}^{(2)}) \cos^2(\alpha_{(1)}^{(2)})}{4\pi\nu_{(1)}^2(\nu_{(1)}^{(2)})^2} \\
& + \frac{a_1 a_2 \sin(\alpha_{(1)}^{(2)})}{4\pi\nu_{(1)}^2(\nu_{(1)}^{(2)})^2} + \frac{a_1 a_2 (d-1) \sin(\beta_{(1)}^{(2)})}{4\pi\nu_{(1)}^3} + \frac{a_1 a_2 \sin(\beta_{(1)}^{(1)})}{4\pi\nu_{(1)}^3} \\
& - \frac{a_1 a_2 (d-1) \sin(\beta_{(1)}^{(2)}) \cos^2(\beta_{(1)}^{(2)})}{4\pi(\mu_{(1)}^{(2)})^2\nu_{(1)}^3} - \frac{a_1 a_2 \sin(\beta_{(1)}^{(1)}) \cos^2(\beta_{(1)}^{(1)})}{4\pi(\mu_{(1)}^{(1)})^2\nu_{(1)}^3} \\
& + \frac{a_1 \sin(\beta_{(1)}^{(2)}) \cos(\beta_{(1)}^{(2)})}{4\pi(\mu_{(1)}^{(2)})^2\nu_{(1)}^2} + \frac{a_2^2 \cos(\alpha_{(1)}^{(2)})}{4\pi\nu_{(1)}^2\nu_{(1)}^{(2)}} + \frac{a_2^2 (d-2) \sin(\alpha_{(1)}^{(2)})}{4\pi\nu_{(1)}^2(\nu_{(1)}^{(2)})^2} \\
& - \frac{a_2^2 (d-1) \sin(\alpha_{(1)}^{(2)}) \cos(\alpha_{(1)}^{(2)})}{4\pi\nu_{(1)}^2(\nu_{(1)}^{(2)})^2} + \frac{a_2 \sin(\beta_{(1)}^{(1)}) \cos(\beta_{(1)}^{(1)})}{4\pi(\mu_{(1)}^{(1)})^2\nu_{(1)}^2} + \frac{\alpha_{(1)}^{(2)}}{4\pi} - \frac{1}{4},
\end{aligned}$$

$$\begin{aligned}
T_{2,2}^s = & -\frac{a_1^2}{2\pi\nu_{(1)}^2\nu_{(1)}^{(2)}} + \frac{a_1^2 \sin(\alpha_{(1)}^{(2)})}{2\pi\nu_{(1)}^2(\nu_{(1)}^{(2)})^2} + \frac{a_1 a_2 d \cos(\alpha_{(1)}^{(2)})}{2\pi\nu_{(1)}^2\nu_{(1)}^{(2)}} - \frac{a_1 a_2 d \sin(\alpha_{(1)}^{(2)}) \cos(\alpha_{(1)}^{(2)})}{2\pi\nu_{(1)}^2(\nu_{(1)}^{(2)})^2} \\
& - \frac{a_1 a_2 (d-2)}{2\pi\nu_{(1)}^2\nu_{(1)}^{(2)}} + \frac{a_1 a_2 (d-2) \sin(\alpha_{(1)}^{(2)})}{2\pi\nu_{(1)}^2(\nu_{(1)}^{(2)})^2} + \frac{a_2^2 d \sin(\beta_{(1)}^{(1)})}{4\pi\nu_{(1)}^3} \\
& - \frac{a_2^2 d \sin(\beta_{(1)}^{(1)}) \cos^2(\beta_{(1)}^{(1)})}{4\pi(\mu_{(1)}^{(1)})^2\nu_{(1)}^3} - \frac{a_2^2 (d^2 - d) \sin(\alpha_{(1)}^{(2)})}{4\pi\nu_{(1)}^2} - \frac{a_2^2}{2\pi\nu_{(1)}^2\nu_{(1)}^{(2)}} \\
& - \frac{a_2^2 (d^2 - 2d) \sin(\alpha_{(1)}^{(2)}) \cos(\alpha_{(1)}^{(2)})}{2\pi\nu_{(1)}^2(\nu_{(1)}^{(2)})^2} + \frac{a_2^2 (d^2 - d) \sin(\alpha_{(1)}^{(2)}) \cos^2(\alpha_{(1)}^{(2)})}{4\pi\nu_{(1)}^2(\nu_{(1)}^{(2)})^2} \\
& + \frac{a_2^2 (d^2 - 3d + 2) \sin(\alpha_{(1)}^{(2)})}{4\pi\nu_{(1)}^2(\nu_{(1)}^{(2)})^2} + \frac{a_2^2 (d^2 - d) \sin(\beta_{(1)}^{(2)})}{4\pi\nu_{(1)}^3} \\
& - \frac{a_2^2 (d^2 - d) \sin(\beta_{(1)}^{(2)}) \cos^2(\beta_{(1)}^{(2)})}{4\pi(\mu_{(1)}^{(2)})^2\nu_{(1)}^3} + \frac{a_2 d \sin(\beta_{(1)}^{(2)}) \cos(\beta_{(1)}^{(2)})}{2\pi(\mu_{(1)}^{(2)})^2\nu_{(1)}^2} - \frac{\alpha_{(1)}^{(2)} (d-2)}{4\pi} \\
& + \frac{d}{4} + \frac{(d-1) \sin(\alpha_{(1)}^{(2)})}{2\pi} - \frac{(d-1) \sin(\beta_{(1)}^{(2)})}{2\pi\nu_{(1)}} - \frac{\sin(\beta_{(1)}^{(1)})}{2\pi\nu_{(1)}} - \frac{\sin(\beta_{(1)}^{(2)})}{2\pi(\mu_{(1)}^{(2)})^2\nu_{(1)}},
\end{aligned}$$

$$\begin{aligned}
T_{2,3}^s = & -\frac{a_1 a_2 (d-2) \sin(\alpha_{(1)}^{(2)}) \cos(\alpha_{(1)}^{(2)})}{2\pi\nu_{(1)}^2 (\nu_{(1)}^{(2)})^2} + \frac{a_1 a_2 (d-2) \sin(\alpha_{(1)}^{(2)})}{2\pi\nu_{(1)}^2 (\nu_{(1)}^{(2)})^2} \\
& - \frac{a_2^2 (d^2 - 3d + 2) \sin(\alpha_{(1)}^{(2)})}{4\pi\nu_{(1)}^2} + \frac{a_2^2 (d-2) \cos(\alpha_{(1)}^{(2)})}{2\pi\nu_{(1)}^2 \nu_{(1)}^{(2)}} - \frac{a_2^2 (d-2)}{2\pi\nu_{(1)}^2 \nu_{(1)}^{(2)}} \\
& + \frac{a_2^2 (d^2 - 5d + 6) \sin(\alpha_{(1)}^{(2)})}{4\pi\nu_{(1)}^2 (\nu_{(1)}^{(2)})^2} - \frac{a_2^2 (d^2 - 4d + 4) \sin(\alpha_{(1)}^{(2)}) \cos(\alpha_{(1)}^{(2)})}{2\pi\nu_{(1)}^2 (\nu_{(1)}^{(2)})^2} \\
& + \frac{a_2^2 (d^2 - 3d + 2) \sin(\alpha_{(1)}^{(2)}) \cos^2(\alpha_{(1)}^{(2)})}{4\pi\nu_{(1)}^2 (\nu_{(1)}^{(2)})^2} \\
& + \frac{a_2^2 (d-2) \sin(\beta_{(1)}^{(1)})}{4\pi\nu_{(1)}^3} + \frac{a_2^2 (d^2 - 3d + 2) \sin(\beta_{(1)}^{(2)})}{4\pi\nu_{(1)}^3} \\
& - \frac{a_2^2 (d^2 - 3d + 2) \sin(\beta_{(1)}^{(2)}) \cos^2(\beta_{(1)}^{(2)})}{4\pi (\mu_{(1)}^{(2)})^2 \nu_{(1)}^3} - \frac{a_2^2 (d-2) \sin(\beta_{(1)}^{(1)}) \cos^2(\beta_{(1)}^{(1)})}{4\pi (\mu_{(1)}^{(1)})^2 \nu_{(1)}^3} \\
& + \frac{a_2 (d-2) \sin(\beta_{(1)}^{(2)}) \cos(\beta_{(1)}^{(2)})}{2\pi (\mu_{(1)}^{(2)})^2 \nu_{(1)}^2} + \frac{\alpha_{(1)}^{(2)} (d-2)}{4\pi} - \frac{d}{4} + \frac{1}{2},
\end{aligned}$$

$$\begin{aligned}
T_{2,4}^s = & -\frac{a_2 \alpha_{(1)}^{(2)} (d-2)}{4\pi} + \frac{a_2 d}{4} + \frac{a_2 (d-2) \sin(\alpha_{(1)}^{(2)})}{4\pi} \\
& - \frac{a_2 (d-1) \sin(\beta_{(1)}^{(2)})}{4\pi\nu_{(1)}} - \frac{a_2 \sin(\beta_{(1)}^{(1)})}{4\pi\nu_{(1)}} + \frac{\beta_{(1)}^{(2)}}{4\pi} - \frac{1}{4},
\end{aligned}$$

$$\begin{aligned}
T_{3,1}^s = & -\frac{a_1^2 \cos(\alpha_{(1)}^{(2)})}{4\pi\nu_{(1)}^2 \nu_{(1)}^{(2)}} - \frac{a_1^2 \sin(\alpha_{(1)}^{(2)}) \cos(\alpha_{(1)}^{(2)})}{4\pi\nu_{(1)}^2 (\nu_{(1)}^{(2)})^2} - \frac{a_1 a_2 (d-1) \sin(\alpha_{(1)}^{(2)})}{4\pi\nu_{(1)}^2} + \frac{a_1 a_2 \cos(\alpha_{(1)}^{(2)})}{2\pi\nu_{(1)}^2 \nu_{(1)}^{(2)}} \\
& - \frac{a_1 a_2 (d-2) \sin(\alpha_{(1)}^{(2)}) \cos(\alpha_{(1)}^{(2)})}{4\pi\nu_{(1)}^2 (\nu_{(1)}^{(2)})^2} + \frac{a_1 a_2 (d-1) \sin(\alpha_{(1)}^{(2)}) \cos^2(\alpha_{(1)}^{(2)})}{4\pi\nu_{(1)}^2 (\nu_{(1)}^{(2)})^2} \\
& + \frac{a_1 a_2 \sin(\alpha_{(1)}^{(2)})}{4\pi\nu_{(1)}^2 (\nu_{(1)}^{(2)})^2} + \frac{a_1 a_2 (d-1) \sin(\beta_{(1)}^{(2)})}{4\pi\nu_{(1)}^3} + \frac{a_1 a_2 \sin(\beta_{(1)}^{(1)})}{4\pi\nu_{(1)}^3} \\
& - \frac{a_1 a_2 (d-1) \sin(\beta_{(1)}^{(2)}) \cos^2(\beta_{(1)}^{(2)})}{4\pi (\mu_{(1)}^{(2)})^2 \nu_{(1)}^3} - \frac{a_1 a_2 \sin(\beta_{(1)}^{(1)}) \cos^2(\beta_{(1)}^{(1)})}{4\pi (\mu_{(1)}^{(1)})^2 \nu_{(1)}^3} \\
& + \frac{a_1 \sin(\beta_{(1)}^{(2)}) \cos(\beta_{(1)}^{(2)})}{4\pi (\mu_{(1)}^{(2)})^2 \nu_{(1)}^2} + \frac{a_2^2 \cos(\alpha_{(1)}^{(2)})}{4\pi\nu_{(1)}^2 \nu_{(1)}^{(2)}} - \frac{a_2^2}{2\pi\nu_{(1)}^2 \nu_{(1)}^{(2)}} + \frac{a_2^2 (d-2) \sin(\alpha_{(1)}^{(2)})}{4\pi\nu_{(1)}^2 (\nu_{(1)}^{(2)})^2} \\
& - \frac{a_2^2 (d-1) \sin(\alpha_{(1)}^{(2)}) \cos(\alpha_{(1)}^{(2)})}{4\pi\nu_{(1)}^2 (\nu_{(1)}^{(2)})^2} + \frac{a_2 \sin(\beta_{(1)}^{(1)}) \cos(\beta_{(1)}^{(1)})}{4\pi (\mu_{(1)}^{(1)})^2 \nu_{(1)}^2} - \frac{\alpha_{(1)}^{(2)}}{4\pi} + \frac{1}{4},
\end{aligned}$$

$$\begin{aligned}
T_{3,2}^s = & -\frac{a_1 a_2 d \sin(\alpha_{(1)}^{(2)}) \cos(\alpha_{(1)}^{(2)})}{2\pi \nu_{(1)}^2 (\nu_{(1)}^{(2)})^2} + \frac{a_1 a_2 d \sin(\alpha_{(1)}^{(2)})}{2\pi \nu_{(1)}^2 (\nu_{(1)}^{(2)})^2} + \frac{a_2^2 d \cos(\alpha_{(1)}^{(2)})}{2\pi \nu_{(1)}^2 \nu_{(1)}^{(2)}} - \frac{a_2^2 d}{2\pi \nu_{(1)}^2 \nu_{(1)}^{(2)}} \\
& + \frac{a_2^2 d \sin(\beta_{(1)}^{(1)})}{4\pi \nu_{(1)}^3} - \frac{a_2^2 d \sin(\beta_{(1)}^{(1)}) \cos^2(\beta_{(1)}^{(1)})}{4\pi (\mu_{(1)}^{(1)})^2 \nu_{(1)}^3} - \frac{a_2^2 (d^2 - d) \sin(\alpha_{(1)}^{(2)})}{4\pi \nu_{(1)}^2} \\
& + \frac{a_2^2 (d^2 - 3d) \sin(\alpha_{(1)}^{(2)})}{4\pi \nu_{(1)}^2 (\nu_{(1)}^{(2)})^2} - \frac{a_2^2 (d^2 - 2d) \sin(\alpha_{(1)}^{(2)}) \cos(\alpha_{(1)}^{(2)})}{2\pi \nu_{(1)}^2 (\nu_{(1)}^{(2)})^2} \\
& + \frac{a_2^2 (d^2 - d) \sin(\alpha_{(1)}^{(2)}) \cos^2(\alpha_{(1)}^{(2)})}{4\pi \nu_{(1)}^2 (\nu_{(1)}^{(2)})^2} + \frac{a_2^2 (d^2 - d) \sin(\beta_{(1)}^{(2)})}{4\pi \nu_{(1)}^3} \\
& - \frac{a_2^2 (d^2 - d) \sin(\beta_{(1)}^{(2)}) \cos^2(\beta_{(1)}^{(2)})}{4\pi (\mu_{(1)}^{(2)})^2 \nu_{(1)}^3} + \frac{a_2 d \sin(\beta_{(1)}^{(2)}) \cos(\beta_{(1)}^{(2)})}{2\pi (\mu_{(1)}^{(2)})^2 \nu_{(1)}^2} + \frac{\alpha_{(1)}^{(2)} d}{4\pi} - \frac{d}{4},
\end{aligned}$$

$$\begin{aligned}
T_{3,3}^s = & \frac{a_1^2}{2\pi \nu_{(1)}^2 \nu_{(1)}^{(2)}} + \frac{a_1^2 \sin(\alpha_{(1)}^{(2)})}{2\pi \nu_{(1)}^2 (\nu_{(1)}^{(2)})^2} + \frac{a_1 a_2 (d-4)}{2\pi \nu_{(1)}^2 \nu_{(1)}^{(2)}} - \frac{a_1 a_2 (d-2) \cos(\alpha_{(1)}^{(2)})}{2\pi \nu_{(1)}^2 \nu_{(1)}^{(2)}} \\
& + \frac{a_1 a_2 (d-4) \sin(\alpha_{(1)}^{(2)})}{2\pi \nu_{(1)}^2 (\nu_{(1)}^{(2)})^2} - \frac{a_1 a_2 (d-2) \sin(\alpha_{(1)}^{(2)}) \cos(\alpha_{(1)}^{(2)})}{2\pi \nu_{(1)}^2 (\nu_{(1)}^{(2)})^2} \\
& - \frac{a_2^2 (d^2 - 3d + 2) \sin(\alpha_{(1)}^{(2)})}{4\pi \nu_{(1)}^2} - \frac{a_2^2 (d - \frac{5}{2})}{\pi \nu_{(1)}^2 \nu_{(1)}^{(2)}} + \frac{a_2^2 (d-2) \cos(\alpha_{(1)}^{(2)})}{\pi \nu_{(1)}^2 \nu_{(1)}^{(2)}} \\
& + \frac{a_2^2 (d^2 - 5d + 8) \sin(\alpha_{(1)}^{(2)})}{4\pi \nu_{(1)}^2 (\nu_{(1)}^{(2)})^2} - \frac{a_2^2 (d^2 - 4d + 4) \sin(\alpha_{(1)}^{(2)}) \cos(\alpha_{(1)}^{(2)})}{2\pi \nu_{(1)}^2 (\nu_{(1)}^{(2)})^2} \\
& + \frac{a_2^2 (d^2 - 3d + 2) \sin(\alpha_{(1)}^{(2)}) \cos^2(\alpha_{(1)}^{(2)})}{4\pi \nu_{(1)}^2 (\nu_{(1)}^{(2)})^2} + \frac{a_2^2 (d-2) \sin(\beta_{(1)}^{(1)})}{4\pi \nu_{(1)}^3} \\
& + \frac{a_2^2 (d^2 - 3d + 2) \sin(\beta_{(1)}^{(2)})}{4\pi \nu_{(1)}^3} - \frac{a_2^2 (d^2 - 3d + 2) \sin(\beta_{(1)}^{(2)}) \cos^2(\beta_{(1)}^{(2)})}{4\pi (\mu_{(1)}^{(2)})^2 \nu_{(1)}^3} \\
& - \frac{a_2^2 (d-2) \sin(\beta_{(1)}^{(1)}) \cos^2(\beta_{(1)}^{(1)})}{4\pi (\mu_{(1)}^{(1)})^2 \nu_{(1)}^3} + \frac{a_2 (d-2) \sin(\beta_{(1)}^{(2)}) \cos(\beta_{(1)}^{(2)})}{2\pi (\mu_{(1)}^{(2)})^2 \nu_{(1)}^2} - \frac{\alpha_{(1)}^{(2)} (d-4)}{4\pi} \\
& + \frac{d}{4} + \frac{(d-1) \sin(\alpha_{(1)}^{(2)})}{2\pi} - \frac{1}{2} - \frac{(d-1) \sin(\beta_{(1)}^{(2)})}{2\pi \nu_{(1)}} - \frac{\sin(\beta_{(1)}^{(1)})}{2\pi \nu_{(1)}} - \frac{\sin(\beta_{(1)}^{(2)})}{2\pi (\mu_{(1)}^{(2)})^2 \nu_{(1)}},
\end{aligned}$$

$$\begin{aligned}
T_{3,4}^s = & -\frac{a_1 \alpha_{(1)}^{(2)}}{2\pi} + \frac{a_1}{2} - \frac{a_2 \alpha_{(1)}^{(2)} (d-4)}{4\pi} + \frac{a_2 (d-2) \sin(\alpha_{(1)}^{(2)})}{4\pi} \\
& + \frac{a_2 (d-2)}{4} - \frac{a_2 (d-1) \sin(\beta_{(1)}^{(2)})}{4\pi \nu_{(1)}} - \frac{a_2 \sin(\beta_{(1)}^{(1)})}{4\pi \nu_{(1)}} + \frac{\beta_{(1)}^{(2)}}{4\pi} - \frac{1}{4},
\end{aligned}$$



$$T_{4,1}^s = \frac{a_1 (d-2) \sin(\alpha_{(1)}^{(2)})}{2\pi} + a_1 - \frac{a_1 (d-1) \sin(\beta_{(1)}^{(2)})}{2\pi\nu_{(1)}} \\ - \frac{a_1 \sin(\beta_{(1)}^{(1)})}{2\pi\nu_{(1)}} - \frac{a_2 \alpha_{(1)}^{(2)} (d-2)}{2\pi} + \frac{a_2 (d-2)}{2} + \frac{\beta_{(1)}^{(1)}}{2\pi} - \frac{1}{2},$$

$$T_{4,2}^s = -\frac{a_2 \alpha_{(1)}^{(2)} (d^2 - 2d)}{2\pi} + \frac{a_2 d^2}{2} - \frac{a_2 d \sin(\beta_{(1)}^{(1)})}{2\pi\nu_{(1)}} \\ + \frac{a_2 (d^2 - 2d) \sin(\alpha_{(1)}^{(2)})}{2\pi} - \frac{a_2 (d^2 - d) \sin(\beta_{(1)}^{(2)})}{2\pi\nu_{(1)}} + \frac{\beta_{(1)}^{(2)} d}{2\pi} - \frac{d}{2},$$

$$T_{4,3}^s = -\frac{a_1 \alpha_{(1)}^{(2)} (d-2)}{\pi} + a_1 (d-2) - \frac{a_2 \alpha_{(1)}^{(2)} (d^2 - 6d + 8)}{2\pi} \\ + \frac{a_2 (d^2 - 4d + 4) \sin(\alpha_{(1)}^{(2)})}{2\pi} + \frac{a_2 (d^2 - 4d + 4)}{2} - \frac{a_2 (d-2) \sin(\beta_{(1)}^{(1)})}{2\pi\nu_{(1)}} \\ - \frac{a_2 (d^2 - 3d + 2) \sin(\beta_{(1)}^{(2)})}{2\pi\nu_{(1)}} + \frac{\beta_{(1)}^{(2)} (d-2)}{2\pi} - \frac{d}{2} + 1,$$

$$T_{4,4}^s = \frac{\alpha_{(1)}^{(2)} \nu_{(1)}^2 \cos(\alpha_{(1)}^{(2)})}{2\pi} - \frac{\nu_{(1)}^2 \sin(\alpha_{(1)}^{(2)})}{2\pi} - \frac{\nu_{(1)}^2 \cos(\alpha_{(1)}^{(2)})}{2} + \frac{\nu_{(1)}^2}{2}.$$

**t-rep.** Let the associated  $3 \times 3$  transition matrix be denoted by  $T^t$ . Then,

$$T_{1,1}^t = -\frac{a_1^2 (d-1) \sin(\alpha_{(1)}^{(2)})}{2\pi\nu_{(1)}^2} + \frac{a_1^2 (d-1)}{2\pi\nu_{(1)}^2 \nu_{(1)}^{(2)}} + \frac{a_1^2 (d-1) \sin(\alpha_{(1)}^{(2)}) \cos^2(\alpha_{(1)}^{(2)})}{2\pi\nu_{(1)}^2 (\nu_{(1)}^{(2)})^2} \\ + \frac{a_1^2 (d-1) \sin(\beta_{(1)}^{(2)})}{2\pi\nu_{(1)}^3} + \frac{a_1^2 \sin(\beta_{(1)}^{(1)})}{2\pi\nu_{(1)}^3} - \frac{a_1^2 (d-1) \sin(\beta_{(1)}^{(2)}) \cos^2(\beta_{(1)}^{(2)})}{2\pi (\mu_{(1)}^{(2)})^2 \nu_{(1)}^3} \\ - \frac{a_1^2 \sin(\beta_{(1)}^{(1)}) \cos^2(\beta_{(1)}^{(1)})}{2\pi (\mu_{(1)}^{(1)})^2 \nu_{(1)}^3} - \frac{a_1 a_2 (d-1) \cos(\alpha_{(1)}^{(2)})}{\pi\nu_{(1)}^2 \nu_{(1)}^{(2)}} \\ - \frac{a_1 a_2 (d-1) \sin(\alpha_{(1)}^{(2)}) \cos(\alpha_{(1)}^{(2)})}{\pi\nu_{(1)}^2 (\nu_{(1)}^{(2)})^2} + \frac{a_1 \sin(\beta_{(1)}^{(1)}) \cos(\beta_{(1)}^{(1)})}{\pi (\mu_{(1)}^{(1)})^2 \nu_{(1)}^2} \\ + \frac{a_2^2 (d-1)}{2\pi\nu_{(1)}^2 \nu_{(1)}^{(2)}} + \frac{a_2^2 (d-1) \sin(\alpha_{(1)}^{(2)})}{2\pi\nu_{(1)}^2 (\nu_{(1)}^{(2)})^2} + \frac{(d-1) \sin(\alpha_{(1)}^{(2)})}{2\pi} \\ + \frac{1}{2} - \frac{(d-1) \sin(\beta_{(1)}^{(2)})}{2\pi\nu_{(1)}} - \frac{\sin(\beta_{(1)}^{(1)})}{2\pi\nu_{(1)}} - \frac{\sin(\beta_{(1)}^{(1)})}{2\pi (\mu_{(1)}^{(1)})^2 \nu_{(1)}},$$

$$\begin{aligned}
T_{1,2}^t = & -\frac{a_1^2 (d-1) \cos(\alpha_{(1)}^{(2)})}{2\pi\nu_{(1)}^2\nu_{(1)}^{(2)}} - \frac{a_1^2 (d-1) \sin(\alpha_{(1)}^{(2)}) \cos(\alpha_{(1)}^{(2)})}{2\pi\nu_{(1)}^2 (\nu_{(1)}^{(2)})^2} \\
& - \frac{a_1 a_2 (d^2 - 2d + 1) \sin(\alpha_{(1)}^{(2)})}{2\pi\nu_{(1)}^2} + \frac{a_1 a_2 (d^2 - d)}{2\pi\nu_{(1)}^2\nu_{(1)}^{(2)}} - \frac{a_1 a_2 (d^2 - 3d + 2) \cos(\alpha_{(1)}^{(2)})}{2\pi\nu_{(1)}^2\nu_{(1)}^{(2)}} \\
& + \frac{a_1 a_2 (d-1) \sin(\alpha_{(1)}^{(2)})}{2\pi\nu_{(1)}^2 (\nu_{(1)}^{(2)})^2} - \frac{a_1 a_2 (d^2 - 3d + 2) \sin(\alpha_{(1)}^{(2)}) \cos(\alpha_{(1)}^{(2)})}{2\pi\nu_{(1)}^2 (\nu_{(1)}^{(2)})^2} \\
& + \frac{a_1 a_2 (d^2 - 2d + 1) \sin(\alpha_{(1)}^{(2)}) \cos^2(\alpha_{(1)}^{(2)})}{2\pi\nu_{(1)}^2 (\nu_{(1)}^{(2)})^2} + \frac{a_1 a_2 (d-1) \sin(\beta_{(1)}^{(1)})}{2\pi\nu_{(1)}^3} \\
& + \frac{a_1 a_2 (d^2 - 2d + 1) \sin(\beta_{(1)}^{(2)})}{2\pi\nu_{(1)}^3} - \frac{a_1 a_2 (d^2 - 2d + 1) \sin(\beta_{(1)}^{(2)}) \cos^2(\beta_{(1)}^{(2)})}{2\pi (\mu_{(1)}^{(2)})^2 \nu_{(1)}^3} \\
& - \frac{a_1 a_2 (d-1) \sin(\beta_{(1)}^{(1)}) \cos^2(\beta_{(1)}^{(1)})}{2\pi (\mu_{(1)}^{(1)})^2 \nu_{(1)}^3} + \frac{a_1 (d-1) \sin(\beta_{(1)}^{(2)}) \cos(\beta_{(1)}^{(2)})}{2\pi (\mu_{(1)}^{(2)})^2 \nu_{(1)}^2} \\
& + \frac{a_2^2 (d^2 - 3d + 2)}{2\pi\nu_{(1)}^2\nu_{(1)}^{(2)}} - \frac{a_2^2 (d^2 - 2d + 1) \cos(\alpha_{(1)}^{(2)})}{2\pi\nu_{(1)}^2\nu_{(1)}^{(2)}} \\
& + \frac{a_2^2 (d^2 - 3d + 2) \sin(\alpha_{(1)}^{(2)})}{2\pi\nu_{(1)}^2 (\nu_{(1)}^{(2)})^2} - \frac{a_2^2 (d^2 - 2d + 1) \sin(\alpha_{(1)}^{(2)}) \cos(\alpha_{(1)}^{(2)})}{2\pi\nu_{(1)}^2 (\nu_{(1)}^{(2)})^2} \\
& + \frac{a_2 (d-1) \sin(\beta_{(1)}^{(1)}) \cos(\beta_{(1)}^{(1)})}{2\pi (\mu_{(1)}^{(1)})^2 \nu_{(1)}^2} - \frac{\alpha_{(1)}^{(2)} (d-1)}{2\pi} + \frac{d}{2} - \frac{1}{2},
\end{aligned}$$

$$\begin{aligned}
T_{1,3}^t = & \frac{a_1 (d-1) \sin(\alpha_{(1)}^{(2)})}{\pi} + a_1 - \frac{a_1 (d-1) \sin(\beta_{(1)}^{(2)})}{2\pi\nu_{(1)}} \\
& - \frac{a_1 \sin(\beta_{(1)}^{(1)})}{2\pi\nu_{(1)}} - \frac{a_2 \alpha_{(1)}^{(2)} (d-1)}{\pi} + a_2 (d-1) + \frac{\beta_{(1)}^{(1)}}{2\pi} - \frac{1}{2},
\end{aligned}$$

$$\begin{aligned}
T_{2,1}^t = & -\frac{a_1^2 \cos(\alpha_{(1)}^{(2)})}{2\pi\nu_{(1)}^2\nu_{(1)}^{(2)}} - \frac{a_1^2 \sin(\alpha_{(1)}^{(2)}) \cos(\alpha_{(1)}^{(2)})}{2\pi\nu_{(1)}^2(\nu_{(1)}^{(2)})^2} + \frac{a_1 a_2 d}{2\pi\nu_{(1)}^2\nu_{(1)}^{(2)}} - \frac{a_1 a_2 (d-1) \sin(\alpha_{(1)}^{(2)})}{2\pi\nu_{(1)}^2} \\
& - \frac{a_1 a_2 (d-2) \cos(\alpha_{(1)}^{(2)})}{2\pi\nu_{(1)}^2\nu_{(1)}^{(2)}} - \frac{a_1 a_2 (d-2) \sin(\alpha_{(1)}^{(2)}) \cos(\alpha_{(1)}^{(2)})}{2\pi\nu_{(1)}^2(\nu_{(1)}^{(2)})^2} \\
& + \frac{a_1 a_2 (d-1) \sin(\alpha_{(1)}^{(2)}) \cos^2(\alpha_{(1)}^{(2)})}{2\pi\nu_{(1)}^2(\nu_{(1)}^{(2)})^2} + \frac{a_1 a_2 \sin(\alpha_{(1)}^{(2)})}{2\pi\nu_{(1)}^2(\nu_{(1)}^{(2)})^2} + \frac{a_1 a_2 (d-1) \sin(\beta_{(1)}^{(2)})}{2\pi\nu_{(1)}^3} \\
& + \frac{a_1 a_2 \sin(\beta_{(1)}^{(1)})}{2\pi\nu_{(1)}^3} - \frac{a_1 a_2 (d-1) \sin(\beta_{(1)}^{(2)}) \cos^2(\beta_{(1)}^{(2)})}{2\pi(\mu_{(1)}^{(2)})^2\nu_{(1)}^3} - \frac{a_1 a_2 \sin(\beta_{(1)}^{(1)}) \cos^2(\beta_{(1)}^{(1)})}{2\pi(\mu_{(1)}^{(1)})^2\nu_{(1)}^3} \\
& + \frac{a_1 \sin(\beta_{(1)}^{(2)}) \cos(\beta_{(1)}^{(2)})}{2\pi(\mu_{(1)}^{(2)})^2\nu_{(1)}^2} + \frac{a_2^2 (d-2)}{2\pi\nu_{(1)}^2\nu_{(1)}^{(2)}} - \frac{a_2^2 (d-1) \cos(\alpha_{(1)}^{(2)})}{2\pi\nu_{(1)}^2\nu_{(1)}^{(2)}} + \frac{a_2^2 (d-2) \sin(\alpha_{(1)}^{(2)})}{2\pi\nu_{(1)}^2(\nu_{(1)}^{(2)})^2} \\
& - \frac{a_2^2 (d-1) \sin(\alpha_{(1)}^{(2)}) \cos(\alpha_{(1)}^{(2)})}{2\pi\nu_{(1)}^2(\nu_{(1)}^{(2)})^2} + \frac{a_2 \sin(\beta_{(1)}^{(1)}) \cos(\beta_{(1)}^{(1)})}{2\pi(\mu_{(1)}^{(1)})^2\nu_{(1)}^2} - \frac{\alpha_{(1)}^{(2)}}{2\pi} + \frac{1}{2},
\end{aligned}$$

$$\begin{aligned}
T_{2,2}^t = & \frac{a_1^2}{2\pi\nu_{(1)}^2\nu_{(1)}^{(2)}} + \frac{a_1^2 \sin(\alpha_{(1)}^{(2)})}{2\pi\nu_{(1)}^2(\nu_{(1)}^{(2)})^2} + \frac{a_1 a_2 (d-2)}{\pi\nu_{(1)}^2\nu_{(1)}^{(2)}} - \frac{a_1 a_2 (d-1) \cos(\alpha_{(1)}^{(2)})}{\pi\nu_{(1)}^2\nu_{(1)}^{(2)}} \\
& + \frac{a_1 a_2 (d-2) \sin(\alpha_{(1)}^{(2)})}{\pi\nu_{(1)}^2(\nu_{(1)}^{(2)})^2} - \frac{a_1 a_2 (d-1) \sin(\alpha_{(1)}^{(2)}) \cos(\alpha_{(1)}^{(2)})}{\pi\nu_{(1)}^2(\nu_{(1)}^{(2)})^2} \\
& - \frac{a_2^2 (d^2 - 2d + 1) \sin(\alpha_{(1)}^{(2)})}{2\pi\nu_{(1)}^2} - \frac{a_2^2 (d^2 - 3d + 2) \cos(\alpha_{(1)}^{(2)})}{\pi\nu_{(1)}^2\nu_{(1)}^{(2)}} + \frac{a_2^2 (d^2 - 3d + \frac{5}{2})}{\pi\nu_{(1)}^2\nu_{(1)}^{(2)}} \\
& + \frac{a_2^2 (d^2 - 4d + 4) \sin(\alpha_{(1)}^{(2)})}{2\pi\nu_{(1)}^2(\nu_{(1)}^{(2)})^2} - \frac{a_2^2 (d^2 - 3d + 2) \sin(\alpha_{(1)}^{(2)}) \cos(\alpha_{(1)}^{(2)})}{\pi\nu_{(1)}^2(\nu_{(1)}^{(2)})^2} \\
& + \frac{a_2^2 (d^2 - 2d + 1) \sin(\alpha_{(1)}^{(2)}) \cos^2(\alpha_{(1)}^{(2)})}{2\pi\nu_{(1)}^2(\nu_{(1)}^{(2)})^2} + \frac{a_2^2 (d-1) \sin(\beta_{(1)}^{(1)})}{2\pi\nu_{(1)}^3} \\
& + \frac{a_2^2 (d^2 - 2d + 1) \sin(\beta_{(1)}^{(2)})}{2\pi\nu_{(1)}^3} - \frac{a_2^2 (d^2 - 2d + 1) \sin(\beta_{(1)}^{(2)}) \cos^2(\beta_{(1)}^{(2)})}{2\pi(\mu_{(1)}^{(2)})^2\nu_{(1)}^3} \\
& - \frac{a_2^2 (d-1) \sin(\beta_{(1)}^{(1)}) \cos^2(\beta_{(1)}^{(1)})}{2\pi(\mu_{(1)}^{(1)})^2\nu_{(1)}^3} + \frac{a_2 (d-1) \sin(\beta_{(1)}^{(2)}) \cos(\beta_{(1)}^{(2)})}{\pi(\mu_{(1)}^{(2)})^2\nu_{(1)}^2} - \frac{\alpha_{(1)}^{(2)} (d-2)}{2\pi} \\
& + \frac{d}{2} + \frac{(d-1) \sin(\alpha_{(1)}^{(2)})}{2\pi} - \frac{1}{2} - \frac{(d-1) \sin(\beta_{(1)}^{(2)})}{2\pi\nu_{(1)}} - \frac{\sin(\beta_{(1)}^{(1)})}{2\pi\nu_{(1)}} - \frac{\sin(\beta_{(1)}^{(2)})}{2\pi(\mu_{(1)}^{(2)})^2\nu_{(1)}},
\end{aligned}$$

$$T_{2,3}^t = -\frac{a_1 \alpha_{(1)}^{(2)}}{\pi} + a_1 - \frac{a_2 \alpha_{(1)}^{(2)} (d-2)}{\pi} + \frac{a_2 (d-1) \sin(\alpha_{(1)}^{(2)})}{\pi} \\ + a_2 (d-1) - \frac{a_2 (d-1) \sin(\beta_{(1)}^{(2)})}{2\pi\nu_{(1)}} - \frac{a_2 \sin(\beta_{(1)}^{(1)})}{2\pi\nu_{(1)}} + \frac{\beta_{(1)}^{(2)}}{2\pi} - \frac{1}{2},$$

$$T_{3,1}^t = \frac{a_1 (d-1) \sin(\alpha_{(1)}^{(2)})}{\pi} + a_1 - \frac{a_1 (d-1) \sin(\beta_{(1)}^{(2)})}{2\pi\nu_{(1)}} \\ - \frac{a_1 \sin(\beta_{(1)}^{(1)})}{2\pi\nu_{(1)}} - \frac{a_2 \alpha_{(1)}^{(2)} (d-1)}{\pi} + a_2 (d-1) + \frac{\beta_{(1)}^{(1)}}{2\pi} - \frac{1}{2},$$

$$T_{3,2}^t = -\frac{a_1 \alpha_{(1)}^{(2)} (d-1)}{\pi} + a_1 (d-1) - \frac{a_2 \alpha_{(1)}^{(2)} (d^2 - 3d + 2)}{\pi} \\ + \frac{a_2 (d^2 - 2d + 1) \sin(\alpha_{(1)}^{(2)})}{\pi} + a_2 (d^2 - 2d + 1) - \frac{a_2 (d-1) \sin(\beta_{(1)}^{(1)})}{2\pi\nu_{(1)}} \\ - \frac{a_2 (d^2 - 2d + 1) \sin(\beta_{(1)}^{(2)})}{2\pi\nu_{(1)}} + \frac{\beta_{(1)}^{(2)} (d-1)}{2\pi} - \frac{d}{2} + \frac{1}{2},$$

$$T_{3,3}^t = -\frac{\alpha_{(1)}^{(2)} \nu_{(1)}^2 (d-1) \cos(\alpha_{(1)}^{(2)})}{2\pi} + \frac{\nu_{(1)}^2 (d-1) \sin(\alpha_{(1)}^{(2)})}{2\pi} + \frac{\nu_{(1)}^2 (d-1) \cos(\alpha_{(1)}^{(2)})}{2} + \frac{\nu_{(1)}^2}{2}.$$

## F Power series and Hessian spectrum by representation

We present the (fractional) power series of the minima described in [Theorem 1](#) to  $O(d^{-5/2})$ -order, along with the respective eigenvalues arranged by their representation.

### F.1 Theorem 1, case 2a

$$a_1 = 1 + \frac{8}{\pi d^2} + O(d^{-5/2}), \\ a_2 = -\frac{4}{\pi d^2} + O(d^{-5/2}), \\ a_3 = \frac{2}{d} + \frac{-\frac{8}{\pi} - 2}{d^2} + O(d^{-5/2}), \\ a_4 = \frac{4}{\pi d} + \frac{32}{\pi^3 d^{3/2}} + \frac{8(-7\pi^3 - 8\pi^2 + 64)}{\pi^5 d^2} + O(d^{-5/2}), \\ a_5 = -1 + \frac{\frac{8}{\pi^2} + 2 + \frac{8}{\pi}}{d} - \frac{64(12 - \pi)}{3\pi^4 d^{3/2}(-2 + \pi)} + \\ - \frac{2(-128\pi^3 - 40\pi^4 - 224\pi^2 - 512\pi + 2560 + \pi^7 + 10\pi^6 + 52\pi^5)}{\pi^6 d^2(-2 + \pi)} + O(d^{-5/2}).$$

### F.2 Eigenvalues

|                         |                        |                       |                       |                       |               |                                                   |                             |                                                       |
|-------------------------|------------------------|-----------------------|-----------------------|-----------------------|---------------|---------------------------------------------------|-----------------------------|-------------------------------------------------------|
| r-Representation        | $\frac{(d-2)(d-3)}{2}$ | $\frac{-2+\pi}{4\pi}$ |                       |                       |               |                                                   |                             |                                                       |
| η-Representation        | $\frac{(d-1)(d-4)}{2}$ | $\frac{2+\pi}{4\pi}$  |                       |                       |               |                                                   |                             |                                                       |
| Standard Representation | $d-2$                  | 0                     | $\frac{-2+\pi}{4\pi}$ | $\frac{-2+\pi}{2\pi}$ | $\frac{1}{4}$ | $\frac{2+\pi}{4\pi}$                              | $\frac{d}{4} + \frac{1}{2}$ |                                                       |
| Trivial Representation  | 1                      | 0                     | 0                     | $\frac{-2+\pi}{2\pi}$ | $\frac{1}{4}$ | $\frac{d}{4} + \frac{-4+\pi+\pi^2}{-8\pi+2\pi^2}$ | $\frac{d}{4} + \frac{1}{2}$ | $\frac{d}{\pi} + \frac{-10\pi+8+\pi^2}{2\pi(-4+\pi)}$ |

### F.3 Theorem 1, case 2b

$$a_1 = -1 + \frac{2}{d} + \frac{4(-16\pi^2 + (-2 + \pi)(-6\pi^3 + 16\pi + 8\pi^2 + \pi^4) + 32\pi)}{\pi^3 d^2 (-2 + \pi)^2} + O\left(d^{-\frac{5}{2}}\right),$$

$$a_2 = \frac{2}{d} + \frac{-2 + \frac{8}{\pi}}{d^2} + O\left(d^{-\frac{5}{2}}\right),$$

$$a_3 = -\frac{4(-32\pi + (-2 + \pi)(-10\pi^2 - 8\pi + 3\pi^3) + 16\pi^2)}{\pi^3 d^2 (-2 + \pi)^2} + O\left(d^{-\frac{5}{2}}\right),$$

$$a_4 = \frac{2 - \frac{4}{\pi}}{d} + \frac{32(1 - \pi)}{\pi^3 d^{\frac{3}{2}}} + \frac{-\frac{136}{\pi^2} - \frac{128}{\pi^3} - 2 - \frac{512}{\pi^5} + \frac{768}{\pi^4} + \frac{52}{\pi}}{d^2} + O\left(d^{-\frac{5}{2}}\right),$$

$$a_5 = 1 + \frac{8(-1 + \pi)}{\pi^2 d} +$$

$$-\frac{2(-90\pi^3 - 792\pi + \pi\sqrt{-160\pi^3 - 12\pi^5 - 192\pi + 64 + \pi^6 + 240\pi^2 + 60\pi^4 + 384 + 11\pi^4 + 468\pi^2})}{3\pi^4 d^{\frac{3}{2}}(-2 + \pi)}$$

$$+ \frac{h_4}{d^2} + O\left(d^{-\frac{5}{2}}\right).$$

### F.4 Eigenvalues

|                         |                        |                       |                       |                       |               |                                                   |                             |                                                       |
|-------------------------|------------------------|-----------------------|-----------------------|-----------------------|---------------|---------------------------------------------------|-----------------------------|-------------------------------------------------------|
| r-Representation        | $\frac{(d-2)(d-3)}{2}$ | $\frac{-2+\pi}{4\pi}$ |                       |                       |               |                                                   |                             |                                                       |
| $\eta$ -Representation  | $\frac{(d-1)(d-4)}{2}$ | $\frac{2+\pi}{4\pi}$  |                       |                       |               |                                                   |                             |                                                       |
| Standard Representation | $d - 2$                | 0                     | $\frac{-2+\pi}{4\pi}$ | $\frac{-2+\pi}{2\pi}$ | $\frac{1}{4}$ | $\frac{2+\pi}{4\pi}$                              | $\frac{d}{4} + \frac{1}{2}$ |                                                       |
| Trivial Representation  | 1                      | 0                     | 0                     | $\frac{-2+\pi}{2\pi}$ | $\frac{1}{4}$ | $\frac{d}{4} + \frac{-4+\pi+\pi^2}{-8\pi+2\pi^2}$ | $\frac{d}{4} + \frac{1}{2}$ | $\frac{d}{\pi} + \frac{-10\pi+8+\pi^2}{2\pi(-4+\pi)}$ |

### F.5 Theorem 1, case 1b

$$a_1 = -1 + \frac{2}{d} + \frac{4(-16\pi^2 + (-2 + \pi)(-6\pi^3 + 16\pi + 8\pi^2 + \pi^4) + 32\pi)}{\pi^3 d^2 (-2 + \pi)^2} + O\left(d^{-\frac{5}{2}}\right),$$

$$a_2 = \frac{2}{d} + \frac{-2 + \frac{8}{\pi}}{d^2} + O\left(d^{-\frac{5}{2}}\right).$$

### F.6 Eigenvalues

|                         |                        |                       |                                                   |                                                       |                             |  |
|-------------------------|------------------------|-----------------------|---------------------------------------------------|-------------------------------------------------------|-----------------------------|--|
| r-Representation        | $\frac{(d-1)(d-2)}{2}$ | $\frac{-2+\pi}{4\pi}$ |                                                   |                                                       |                             |  |
| $\eta$ -Representation  | $\frac{d(d-3)}{2}$     | $\frac{2+\pi}{4\pi}$  |                                                   |                                                       |                             |  |
| Standard Representation | $d - 1$                | 0                     | $\frac{-2+\pi}{2\pi}$                             | $\frac{1}{4}$                                         | $\frac{d}{4} + \frac{1}{2}$ |  |
| Trivial Representation  | 1                      | 0                     | $\frac{d}{4} + \frac{-4+\pi+\pi^2}{2\pi(-4+\pi)}$ | $\frac{d}{\pi} + \frac{-10\pi+8+\pi^2}{2\pi(-4+\pi)}$ |                             |  |

### F.7 Theorem 1, case 3a

$$\begin{aligned}
a_1 &= 1 + \frac{16}{\pi d^2} + O\left(d^{-\frac{5}{2}}\right), \\
a_2 &= -\frac{8}{\pi d^2} + O\left(d^{-\frac{5}{2}}\right), \\
a_3 &= \frac{2}{d} + \frac{2(-8\pi^2 - \pi^3 - 16 + 4\pi)}{\pi^2 d^2 (2 + \pi)} + O\left(d^{-\frac{5}{2}}\right), \\
a_4 &= \frac{4}{\pi d} + \frac{32}{\pi^3 d^{\frac{3}{2}}} + \frac{4(-24\pi^4 - 160\pi^2 - \pi^5 + 256 + 192\pi + 28\pi^3)}{\pi^5 d^2 (2 + \pi)} + O\left(d^{-\frac{5}{2}}\right), \\
a_5 &= -1 + \frac{\frac{8}{\pi^2} + 2 + \frac{8}{\pi}}{d} + \frac{64(12 - \pi)}{3\pi^4 d^{\frac{3}{2}}(-2 + \pi)} \\
&\quad + \frac{2(-112\pi^5 - 3008\pi^2 - 240\pi^4 + 5120 + 2560\pi + \pi^8 + 8\sqrt{2}\pi^6 + 4\sqrt{2}\pi^7 + 672\pi^3 + 12\pi^7 + 104\pi^6)}{\pi^6 d^2 (4 - \pi^2)} \\
&\quad + O\left(d^{-\frac{5}{2}}\right), \\
a_6 &= \frac{2(-12\pi + 16 + \pi^3 + 4\pi^2)}{\pi^2 d (2 + \pi)} + \frac{16(-24\pi^2 + 64 + 24\pi + \pi^4 + 4\pi^3)}{\pi^4 d^{\frac{3}{2}}(4 + \pi^2 + 4\pi)} \\
&\quad + \frac{2\left(\begin{array}{c} -184\pi^7 - 26\pi^8 - 3968\pi^3 - 8192\pi^2 - 16\sqrt{2}\pi^7 - 4\sqrt{2}\pi^8 - 112\pi^5 - \pi^9 \\ -16\sqrt{2}\pi^6 + 20480 + 24576\pi + 864\pi^4 + 112\pi^6 \end{array}\right)}{\pi^6 d^2 (8 + \pi^3 + 12\pi + 6\pi^2)} + O\left(d^{-\frac{5}{2}}\right).
\end{aligned}$$

### F.8 Eigenvalues

|                                                                   |                        |                             |                       |                       |               |                             |                                                   |  |
|-------------------------------------------------------------------|------------------------|-----------------------------|-----------------------|-----------------------|---------------|-----------------------------|---------------------------------------------------|--|
| $\mathfrak{r}$ -Representation                                    | $\frac{(d-3)(d-4)}{2}$ | $\frac{-2+\pi}{4\pi}$       |                       |                       |               |                             |                                                   |  |
| $\eta$ -Representation                                            | $\frac{(d-2)(d-5)}{2}$ | $\frac{2+\pi}{4\pi}$        |                       |                       |               |                             |                                                   |  |
| Standard Representation $\mathfrak{s}_{d-2}$                      | $d-3$                  | 0                           | $\frac{-2+\pi}{4\pi}$ | $\frac{-2+\pi}{2\pi}$ | $\frac{1}{4}$ | $\frac{2+\pi}{4\pi}$        | $\frac{d}{4} + \frac{1}{2}$                       |  |
| Standard Representation $\mathfrak{s}_2$                          | 1                      | 0                           | $\frac{-2+\pi}{4\pi}$ | $\frac{-2+\pi}{2\pi}$ | $\frac{1}{4}$ | $\frac{d}{4} + \frac{1}{2}$ |                                                   |  |
| Trivial Representation                                            | 1                      | 0                           | 0                     | $\frac{-2+\pi}{2\pi}$ | $\frac{1}{4}$ | $\frac{2+\pi}{4\pi}$        | $\frac{d}{4} + \frac{-4+\pi+\pi^2}{-8\pi+2\pi^2}$ |  |
| Tensor Representation $\mathfrak{s}_{d-2} \otimes \mathfrak{s}_2$ | $d-3$                  | $\frac{d}{4} + \frac{1}{2}$ | $\frac{-2+\pi}{4\pi}$ | $\frac{2+\pi}{4\pi}$  |               |                             |                                                   |  |

### F.9 Identity

$$a_1 = 1, a_2 = 0.$$

### F.10 Eigenvalues

|                                |                        |                       |                                                   |                                                       |  |                             |  |
|--------------------------------|------------------------|-----------------------|---------------------------------------------------|-------------------------------------------------------|--|-----------------------------|--|
| $\mathfrak{r}$ -Representation | $\frac{(d-1)(d-2)}{2}$ | $\frac{-2+\pi}{4\pi}$ |                                                   |                                                       |  |                             |  |
| $\eta$ -Representation         | $\frac{d(d-3)}{2}$     | $\frac{2+\pi}{4\pi}$  |                                                   |                                                       |  |                             |  |
| Standard Representation        | $d-1$                  | 0                     | $\frac{-2+\pi}{2\pi}$                             | $\frac{1}{4}$                                         |  | $\frac{d}{4} + \frac{1}{2}$ |  |
| Trivial Representation         | 1                      | 0                     | $\frac{d}{4} + \frac{-4+\pi+\pi^2}{2\pi(-4+\pi)}$ | $\frac{d}{\pi} + \frac{-10\pi+8+\pi^2}{2\pi(-4+\pi)}$ |  |                             |  |

### F.11 Theorem 1, case 3b

$$a_1 = -1 + \frac{2}{d} + \frac{-4 + \frac{24}{\pi}}{d^2} + O\left(d^{-\frac{5}{2}}\right),$$

$$a_2 = \frac{2}{d} + \frac{-2 + \frac{12}{\pi}}{d^2} + O\left(d^{-\frac{5}{2}}\right),$$

$$a_3 = \frac{8(-4\pi - \pi^2 + 8)}{\pi^2 d^2 (2 + \pi)} + O\left(d^{-\frac{5}{2}}\right),$$

$$a_4 = \frac{2 - \frac{4}{\pi}}{d} + \frac{32(1 - \pi)}{\pi^3 d^{\frac{3}{2}}} + \frac{2(-344\pi^3 - \pi^6 - 512 + 4\pi^4 + 384\pi + 512\pi^2 + 26\pi^5)}{\pi^5 d^2 (2 + \pi)} + O\left(d^{-\frac{5}{2}}\right),$$

$$a_5 = 1 + \frac{8(-1 + \pi)}{\pi^2 d} + \frac{8(-24\pi^3 - 200\pi + 96 + 3\pi^4 + 120\pi^2)}{3\pi^4 d^{\frac{3}{2}} (-2 + \pi)}$$

$$+ \frac{2(-224\pi^6 - 6816\pi^3 - 496\pi^5 - 1088\pi^2 - \pi^8 - 5120 + 9728\pi + 52\pi^7 + 4112\pi^4)}{\pi^6 d^2 (4 - \pi^2)}$$

$$+ O\left(d^{-\frac{5}{2}}\right),$$

$$a_6 = \frac{4(-\pi^2 - 8 + 6\pi)}{\pi^2 d (2 + \pi)} + \frac{16(-40\pi^2 - 40\pi - \pi^4 + 64 + 20\pi^3)}{\pi^4 d^{\frac{3}{2}} (4 + \pi^2 + 4\pi)}$$

$$+ \frac{4(-4816\pi^4 - 116\pi^7 - 4544\pi^3 - 10240 + 4096\pi + 5\pi^8 + 14848\pi^2 + 176\pi^6 + 1632\pi^5)}{\pi^6 d^2 (8 + \pi^3 + 12\pi + 6\pi^2)}$$

$$+ O\left(d^{-\frac{5}{2}}\right),$$

### F.12 Eigenvalues

|                                                                   |                        |                             |                       |                       |               |                             |                                                   |
|-------------------------------------------------------------------|------------------------|-----------------------------|-----------------------|-----------------------|---------------|-----------------------------|---------------------------------------------------|
| $\mathfrak{r}$ -Representation                                    | $\frac{(d-3)(d-4)}{2}$ | $\frac{-2+\pi}{4\pi}$       |                       |                       |               |                             |                                                   |
| $\eta$ -Representation                                            | $\frac{(d-2)(d-5)}{2}$ | $\frac{2+\pi}{4\pi}$        |                       |                       |               |                             |                                                   |
| Standard Representation $\mathfrak{s}_{d-2}$                      | $d-3$                  | 0                           | $\frac{-2+\pi}{4\pi}$ | $\frac{-2+\pi}{2\pi}$ | $\frac{1}{4}$ | $\frac{2+\pi}{4\pi}$        | $\frac{d}{4} + \frac{1}{2}$                       |
| Standard Representation $\mathfrak{s}_2$                          | 1                      | 0                           | $\frac{-2+\pi}{4\pi}$ | $\frac{-2+\pi}{2\pi}$ | $\frac{1}{4}$ | $\frac{d}{4} + \frac{1}{2}$ |                                                   |
| Trivial Representation                                            | 1                      | 0                           | 0                     | $\frac{-2+\pi}{2\pi}$ | $\frac{1}{4}$ | $\frac{2+\pi}{4\pi}$        | $\frac{d}{4} + \frac{-4+\pi+\pi^2}{-8\pi+2\pi^2}$ |
| Tensor Representation $\mathfrak{s}_{d-2} \otimes \mathfrak{s}_2$ | $d-3$                  | $\frac{d}{4} + \frac{1}{2}$ | $\frac{-2+\pi}{4\pi}$ | $\frac{2+\pi}{4\pi}$  |               |                             |                                                   |

**F.13 Theorem 1, case 4**

$$\begin{aligned}
 a_1 &= 1 + \frac{24}{\pi d^2} + O\left(d^{-\frac{5}{2}}\right), \\
 a_2 &= -\frac{12}{\pi d^2} + O\left(d^{-\frac{5}{2}}\right), \\
 a_3 &= \frac{2}{d} + \frac{2(-10\pi^2 - 32 - \pi^3 + 16\pi)}{\pi^2 d^2 (2 + \pi)} + O\left(d^{-\frac{5}{2}}\right), \\
 a_4 &= \frac{4}{\pi d} + \frac{32}{\pi^3 d^{\frac{3}{2}}} + \frac{8(-17\pi^4 - 144\pi^2 - \pi^5 + 128 + 128\pi + 50\pi^3)}{\pi^5 d^2 (2 + \pi)} + O\left(d^{-\frac{5}{2}}\right), \\
 a_5 &= -1 + \frac{\frac{8}{\pi^2} + 2 + \frac{8}{\pi}}{d} + \frac{64(12 - \pi)}{3\pi^4 d^{\frac{3}{2}}(-2 + \pi)} \\
 &\quad + \frac{2(-288\pi^5 - 5056\pi^2 - 272\pi^4 + 5120 + \pi^8 + 3584\pi + 8\sqrt{3}\pi^6 + 4\sqrt{3}\pi^7 + 16\pi^7 + 1824\pi^3 + 144\pi^6)}{\pi^6 d^2 (4 - \pi^2)} \\
 &\quad + O\left(d^{-\frac{5}{2}}\right), \\
 a_6 &= \frac{2(-12\pi + 16 + \pi^3 + 4\pi^2)}{\pi^2 d (2 + \pi)} + \frac{16(-24\pi^2 + 64 + 24\pi + \pi^4 + 4\pi^3)}{\pi^4 d^{\frac{3}{2}}(4 + \pi^2 + 4\pi)} \\
 &\quad + \frac{2\left(-1920\pi^5 - 164\pi^7 - 28\pi^8 - 4992\pi^3 - 13824\pi^2 - 16\sqrt{3}\pi^7 - 4\sqrt{3}\pi^8 - \pi^9\right)}{\pi^6 d^2 (8 + \pi^3 + 12\pi + 6\pi^2)} + O\left(d^{-\frac{5}{2}}\right).
 \end{aligned}$$

**F.14 Eigenvalues**

|                                                                   |                        |                             |                       |                       |               |                             |                                                   |  |
|-------------------------------------------------------------------|------------------------|-----------------------------|-----------------------|-----------------------|---------------|-----------------------------|---------------------------------------------------|--|
| $\mathfrak{r}_{d-3}$ -Representation                              | $\frac{(d-5)(d-4)}{2}$ | $\frac{-2+\pi}{4\pi}$       |                       |                       |               |                             |                                                   |  |
| $\mathfrak{r}_3$ -Representation                                  | 1                      | $\frac{-2+\pi}{4\pi}$       |                       |                       |               |                             |                                                   |  |
| $\eta$ -Representation                                            | $\frac{(d-3)(d-6)}{2}$ | $\frac{2+\pi}{4\pi}$        |                       |                       |               |                             |                                                   |  |
| Standard Representation $\mathfrak{s}_{d-3}$                      | $d - 4$                | 0                           | $\frac{-2+\pi}{4\pi}$ | $\frac{-2+\pi}{2\pi}$ | $\frac{1}{4}$ | $\frac{2+\pi}{4\pi}$        | $\frac{d}{4} + \frac{1}{2}$                       |  |
| Standard Representation $\mathfrak{s}_3$                          | 2                      | 0                           | $\frac{-2+\pi}{4\pi}$ | $\frac{-2+\pi}{2\pi}$ | $\frac{1}{4}$ | $\frac{d}{4} + \frac{1}{2}$ |                                                   |  |
| Trivial Representation                                            | 1                      | 0                           | 0                     | $\frac{-2+\pi}{2\pi}$ | $\frac{1}{4}$ | $\frac{2+\pi}{4\pi}$        | $\frac{d}{4} + \frac{-4+\pi+\pi^2}{-8\pi+2\pi^2}$ |  |
| Tensor Representation $\mathfrak{s}_{d-3} \otimes \mathfrak{s}_3$ | $2d - 8$               | $\frac{d}{4} + \frac{1}{2}$ | $\frac{-2+\pi}{4\pi}$ | $\frac{2+\pi}{4\pi}$  |               |                             |                                                   |  |
